# Supplementary material
Source: HighWire-hosted journal article supplement (https://gh.bmj.com/content/7/1/e007525)
Supplement: inline-supplementary-material-1 [file inline-supplementary-material-1.pdf]

**SUPPLEMENTARY APPENDIX****Supplementary appendix 1: Search strategy**

1. exp China/
2. exp Hong Kong/
3. exp Macau/
4. exp Taiwan/
5. exp "Democratic People's Republic of Korea"/
6. exp Japan/
7. exp Mongolia/
8. exp "Republic of Korea"/
9. exp Afghanistan/
10. exp Bangladesh/
11. exp Bhutan/
12. exp India/
13. exp Iran/
14. maldives.mp. or exp Indian Ocean Islands/
15. exp Nepal/
16. exp Pakistan/
17. exp Sri Lanka/
18. exp Brunei/
19. exp Cambodia/
20. exp Indonesia/
21. exp Laos/
22. exp Malaysia/
23. exp Myanmar/
24. exp Philippines/
25. exp Singapore/
26. exp Thailand/
27. timor.mp.
28. exp Vietnam/
29. chronic renal failure.mp. or exp Kidney Failure, Chronic/
30. Glomerular Filtration Rate/
31. exp Proteinuria/
32. exp Hematuria/
33. exp Creatinine/
34. exp Anemia/
35. exp Erythropoietin/
36. exp Iron/
37. exp Ferritins/
38. exp Transferrin/
39. exp Prevalence/
40. exp Epidemiology/
41. exp Cross-Sectional Studies/
42. 1 or 2 or 3 or 4 or 5 or 6 or 7 or 8 or 9 or 10 or 11 or 12 or 13 or 14 or 15 or 16 or 17 or 18 or 19 or 20 or 21 or 22 or 23 or 24 or 25 or 26 or 27 or 28
43. 29 or 30 or 31 or 32 or 33 or 34 or 35 or 36 or 37 or 38
44. 39 or 40 or 41
45. 42 and 43 and 44
46. limit 45 to yr="2000 -Current"

**Supplementary appendix 2: Dendrogram showing grouping of countries into clusters based on country-level sociodemographic characteristics and CKD risk factor prevalence\***

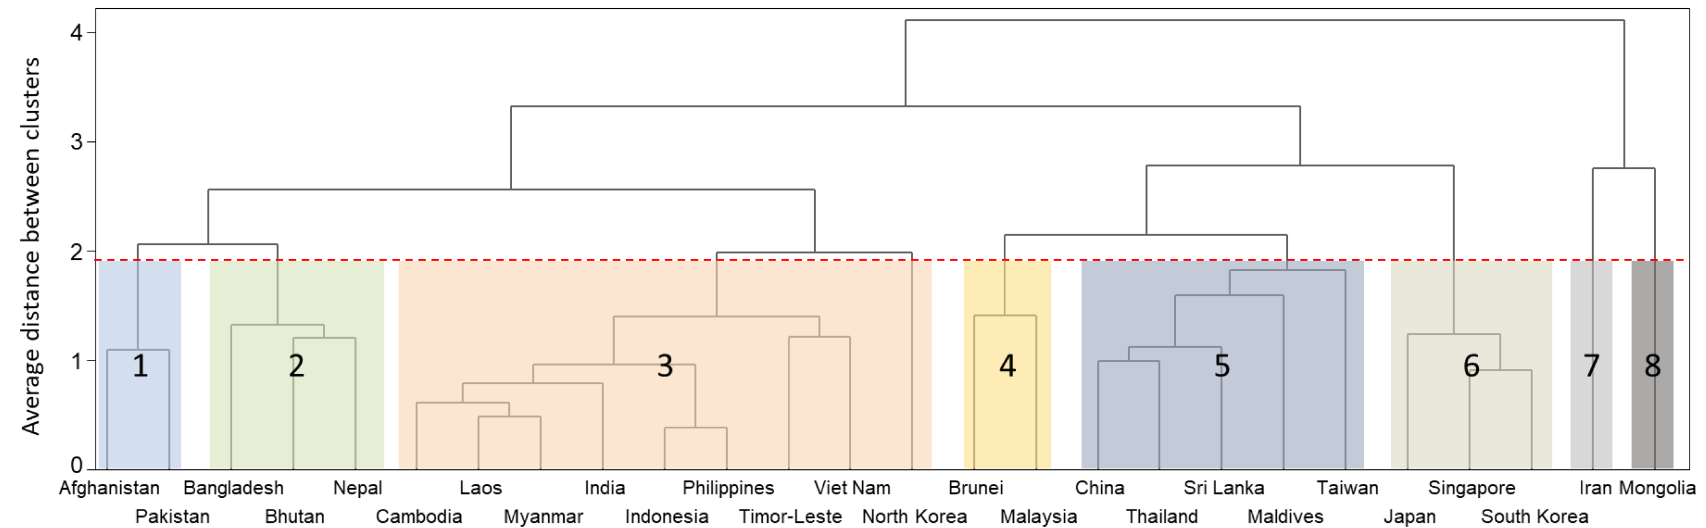

\*life expectancy at birth, GNI per capita, prevalence of diabetes, prevalence of BP  $\geq$ 140/90 mmHg, prevalence of BMI  $\geq$ 30 kg/m<sup>2</sup>

**Supplementary appendix 3: Characteristics of the included studies**

| Reference                                              | Country    | Year | Study design; population-based or high-risk | Overall study size | eGFR equation used | Mean age | Female (%) | Study period (years) | Single or multiple eGFR or proteinuria measurements to assess CKD | Overall CKD prevalence | Advanced CKD prevalence | Proteinuria or albuminuria (%) |
|--------------------------------------------------------|------------|------|---------------------------------------------|--------------------|--------------------|----------|------------|----------------------|-------------------------------------------------------------------|------------------------|-------------------------|--------------------------------|
| Cravedi et al. BMJ Open 2012;2:e001357                 | Bangladesh | 2012 | Cross-sectional; high-risk                  | 1,518              | MDRD               | 48.0     | 56.6       | 0.67                 | Single                                                            | 8.6%                   | 1.5%                    | 45.4%                          |
| Fatema et al. Saudi J Kidney Dis Transpl 2013;3:534-41 | Bangladesh | 2013 | Cross-sectional; population-based           | 634                | MDRD               | 36.9     | 46.0       | NR                   | Single                                                            | 12.8%                  | 0.0%                    | 8.2%                           |
| Khanam et al. J Diabetol 2016;3:2                      | Bangladesh | 2016 | Cross-sectional; high-risk                  | 1,317              | MDRD               | NR       | 45.3       | 1                    | Single                                                            | 13.9%                  | NR                      | NR                             |
| Feng et al. Nephrol Dial Transplant 2019;34:1723-30    | Bangladesh | 2019 | Cross-sectional; high-risk                  | 868                | CKD-EPI            | 56.7     | 63.8       | NR                   | Single                                                            | 36.4%                  | 1.3%                    | 29.6%                          |
| Das et al. PLoS One 2019;14:e0214568                   | Bangladesh | 2019 | Cross-sectional; population-based           | 41,132             | CKD-EPI            | NR       | NR         | 10.0                 | Single                                                            | 27.6%                  | 10.8%                   | NR                             |
| Chen et al. Kidney Int 2005;68:2837-45                 | China      | 2005 | Cross-sectional; population-based           | 15,209             | MDRD               | NR       | NR         | 2                    | Single                                                            | 3.0%                   | 0.1%                    | NR                             |
| Li et al. Clinica Chimica Acta 2006;366:209-215        | China      | 2006 | Cross-sectional; population-based           | 2,310              | MDRD               | 60.7     | 50.5       | NR                   | Single                                                            | 4.9%                   | 4.9%                    | 8.3%                           |
| Liu et al. Clin Chim Acta 2008;387:128-32              | China      | 2008 | Cross-sectional; high-risk                  | 13,298             | MDRD               | 50.6     | 53.6       | NR                   | Single                                                            | 15.0%                  | 2.0%                    | 8.9%                           |
| Sharma et al. Am J Kidney Dis 2010;56:915-27           | China      | 2010 | Cross-sectional; population-based           | 1,999              | MDRD               | NR       | 27.4       | NR                   | Single                                                            | 13.0%                  | 0.6%                    | 20.9%                          |
| Chen et al. Clinica Chimica Acta 2010;411:705-9        | China      | 2010 | Cross-sectional; population-based           | 2,969              | NR                 | 44.0     | 41.8       | 1.7                  | Single                                                            | 9.0%                   | NR                      | 9.0%                           |

|                                                           |       |      |                                          |       |         |      |      |      |        |       |      |       |
|-----------------------------------------------------------|-------|------|------------------------------------------|-------|---------|------|------|------|--------|-------|------|-------|
| Shan et al. Nephrol<br>2010 15:354-61                     | China | 2010 | Cross-sectional;<br>population-<br>based | 3,560 | MDRD    | 51.7 | 45.3 | 0.9  | Single | 12.0% | 0.1% | 4.9%  |
| Luo et al. Vasc Med<br>2010;15:107-12                     | China | 2010 | Prospective;<br>high-risk                | 3,610 | MDRD    | 67.0 | 47.0 | 3.1  | Single | 19.0% | 2.2% | NR    |
| Wang et al. Nephrol<br>Dial Transpl<br>2010;25:3924-31    | China | 2010 | Cross-sectional;<br>population-<br>based | 4,925 | MDRD    | 51.0 | 51.6 | 1.2  | Single | 2.0%  | NR   | NR    |
| Xu et al. Nephrol<br>Dial Transpl<br>2011;26:2590-4       | China | 2011 | Cross-sectional;<br>high-risk            | 1,014 | MDRD    | 68.6 | 44.9 | 0.08 | Single | 26.0% | 4.5% | 32.7% |
| Chen et al. Nephrol<br>Dial Transpl<br>2011;26:1592-9     | China | 2011 | Cross-sectional;<br>population-<br>based | 1,289 | MDRD    | NR   | NR   | NR   | Single | 19.0% | 0.6% | 16.2% |
| Wang. J Int Med Res<br>2012;40:1317-24                    | China | 2012 | Cross-sectional;<br>high-risk            | 513   | MDRD    | 49.4 | NR   | 1    | Single | 11.9% | NR   | 33.5% |
| Liu et al. Scand J<br>Urol Nephrol<br>2012;46:142-7       | China | 2012 | Prospective;<br>population-<br>based     | 567   | MDRD    | 67.3 | 39.2 | 0.25 | Single | 19.0% | 3.0% | NR    |
| Chan et al. J Am Med<br>Dir Assoc<br>2012;13:630-3        | China | 2012 | Cross-sectional;<br>high-risk            | 812   | CKD-EPI | 86.0 | 66.6 | NR   | Single | 25.6% | 4.4% | NR    |
| Liu et al. PLoS One<br>2012;7:e47100                      | China | 2012 | Cross-sectional;<br>population-<br>based | 1,186 | MDRD    | NR   | NR   | 0.17 | Single | 3.0%  | NR   | 7.2%  |
| Wang et al. PLoS One<br>2012;7:e38218                     | China | 2012 | Cross-sectional;<br>high-risk            | 1,365 | MDRD    | 62.4 | 57.7 | 1.4  | Single | 2.1%  | NR   | NR    |
| Miao et al. Cath<br>Cardiovasc Interv<br>2012;80:361-67   | China | 2012 | Prospective;<br>high-risk                | 2,862 | MDRD    | 60.5 | 27.8 | 1    | Single | 16.0% | NR   | NR    |
| Zheng et al. J<br>Hypertens<br>2012;30:901-7              | China | 2012 | Prospective;<br>high-risk                | 3,711 | CKD-EPI | 56.3 | 57.2 | 4.9  | Single | 3.0%  | NR   | NR    |
| Li et al. Kidney and<br>Blood Press Res<br>2012;36:98-106 | China | 2012 | Cross-sectional;<br>population-<br>based | 7,053 | MDRD    | 51.3 | 67.0 | 1    | Single | 11.0% | NR   | 7.8%  |

|                                                |       |      |                                   |        |         |      |      |      |        |       |       |       |
|------------------------------------------------|-------|------|-----------------------------------|--------|---------|------|------|------|--------|-------|-------|-------|
| Zhang et al. Lancet 2012;379:815-22            | China | 2012 | Cross-sectional; population-based | 46,968 | CKD-EPI | 49.6 | NR   | 3.3  | Single | 14.2% | 0.2%  | 7.5%  |
| Chen et al. Hong Ling Med J 2013;19:214-21     | China | 2013 | Cross-sectional; high-risk        | 6,325  | MDRD    | 64.7 | 46.5 | 1.9  | Single | 15.3% | NR    | 21.3% |
| Xiong et al. J Formos Med Assoc 2014;113:521-6 | China | 2014 | Cross-sectional; high-risk        | 785    | MDRD    | 66.6 | 55.4 | 10   | Single | 59.0% | 15.2% | NR    |
| Bao et al. QJM 2014;107:443-9                  | China | 2014 | Cross-sectional; high-risk        | 1,012  | MDRD    | 62.8 | 42.3 | 2.2  | Single | 17.0% | NR    | NR    |
| Fu et al. Clin Interv Aging 2014;9:301-8       | China | 2014 | Prospective; high-risk            | 1,050  | MDRD    | 86.0 | 10.8 | 1.1  | Single | 35.4% | NR    | NR    |
| Fu et al. PLoS One 2014;9:e101013              | China | 2014 | Cross-sectional; population-based | 2,040  | MDRD    | 51.0 | 61.1 | 2.2  | Single | 21.0% | NR    | 21.3% |
| Lin et al. BMC Nephrol 2014;15:36              | China | 2014 | Cross-sectional; population-based | 10,384 | MDRD    | 52.9 | 57.0 | 2.8  | Single | 13.0% | 0.2%  | 11.5% |
| Luo et al. Stroke 2014;45:2887-93              | China | 2014 | Cross-sectional; high-risk        | 17,280 | CKD-EPI | 63.5 | 38.6 | NR   | Single | 11.0% | NR    | NR    |
| Liu et al. Renal Failure 2015;37:1323-8        | China | 2015 | Cross-sectional; high-risk        | 1,062  | CKD-EPI | 79.6 | 32.1 | 4.5  | Single | 41.0% | 6.9%  | 24.8% |
| Yang et al. BMC Nephrology 2015;16:16          | China | 2015 | Cross-sectional; high-risk        | 1,115  | MDRD    | 53.2 | 68.7 | 0.42 | Single | 23.0% | NR    | 20.3% |
| Luk et al. PLoS One 2015;10:e0134981           | China | 2015 | Cross-sectional; high-risk        | 2,833  | MDRD    | 58.6 | 44.4 | 1.4  | Single | 5.8%  | NR    | 36%   |
| Wang et al. Nephrology 2015;20:474-84          | China | 2015 | Cross-sectional; high-risk        | 8,659  | CKD-EPI | 61.0 | 52.4 | 2    | Single | 10.0% | 0.4%  | NR    |
| Kong et al. Int Urol Nephrol 2015;47:1547-53   | China | 2015 | Cross-sectional; high-risk        | 24,002 | CKD-EPI | 49.9 | 28.5 | 1.7  | Single | 3.0%  | NR    | 1.8%  |
| Zhao et al. PLoS One 2015;10:e0135462          | China | 2015 | Cross-sectional; high-risk        | 41,862 | MDRD    | NR   | 31.5 | 1    | Single | 3.0%  | NR    | NR    |

|                                                    |       |      |                                   |         |                 |      |      |      |        |       |      |       |
|----------------------------------------------------|-------|------|-----------------------------------|---------|-----------------|------|------|------|--------|-------|------|-------|
| Peng et al. Eur J Intern Med 2016;29:78-87         | China | 2016 | Cross-sectional; high-risk        | 2,161   | MDRD            | 64.6 | 20.5 | 2.6  | Single | 18.0% | NR   | NR    |
| Peng et al. Medicine 2016;95:e2740                 | China | 2016 | Cross-sectional; high-risk        | 3,002   | MDRD            | 64.5 | 20.5 | 2.4  | Single | 17.0% | 2.2% | NR    |
| Guo et al. J Diabetes Complications 2016;30:803-10 | China | 2016 | Cross-sectional; high-risk        | 3,301   | MDRD            | 59.3 | 44.9 | 8    | Single | 27.0% | 0.8% | 25.2% |
| He et al. Medicine 2016;95:e3769                   | China | 2016 | Cross-sectional; population-based | 123,629 | MDRD            | 44.8 | 36.8 | NR   | Single | 5.0%  | NR   | 4.3%  |
| Dong et al. Medicine 2017;e5868                    | China | 2017 | Cross-sectional; high-risk        | 972     | MDRD            | 68.0 | 46.8 | 3    | Single | 13.0% | NR   | NR    |
| Sun et al. Chin Med J 2017;130:57-63               | China | 2017 | Cross-sectional; high-risk        | 1,401   | CKD-EPI         | 58.4 | 42.8 | 5.7  | Single | 39.0% | NR   | NR    |
| Yeung et al. J Hepatol 2017;S0168-8278             | China | 2017 | Prospective; high-risk            | 1,763   | CKD-EPI         | 60.7 | 44.5 | 1.2  | Single | 20.2% | 4.5% | 47.6% |
| Inoue et al. BMC Nephrol 2017;18:160               | China | 2017 | Prospective; population-based     | 7,798   | CKD-EPI         | 51.0 | 53.3 | NR   | Single | 8.1%  | NR   | NR    |
| Wang et al. BMC Nephrol 2017;18:188                | China | 2017 | Cross-sectional; population-based | 47,204  | CKD-EPI         | 49.6 | 57.3 | 8.7  | Single | 4.0%  | NR   | 11.6% |
| Wang et al. Biomedical Research 2018;29:3062-8     | China | 2018 | Prospective; high-risk            | 2,511   | Cockcroft-Gault | 66.6 | 27.7 | 3.3  | Single | 22.9% | NR   | NR    |
| Ma et al. Int Urol Nephrol 2018;50:2239-44         | China | 2018 | Prospective; high-risk            | 3,237   | CKD-EPI         | 57.9 | 68.3 | 3    | Single | 6.0%  | NR   | NR    |
| Lin et al. BMJ Open 2018;8:e019097                 | China | 2018 | Cross-sectional; high-risk        | 9,438   | MDRD            | 55.9 | 71.4 | 0.49 | Single | 8.0%  | NR   | NR    |
| Wang et al. BMC Nephrology 2018;19:294             | China | 2018 | Cross-sectional; population-based | 11,578  | CKD-EPI         | 53.8 | 53.7 | 0.66 | Single | 2.0%  | NR   | NR    |
| Wang et al. PLoS ONE 2018;13:e0193734              | China | 2018 | Cross-sectional; population-based | 25,269  | CKD-EPI         | 47.1 | 52.0 | 4    | Single | 10.7% | NR   | 7.6%  |

|                                                               |       |      |                                   |           |         |      |      |      |          |       |      |       |
|---------------------------------------------------------------|-------|------|-----------------------------------|-----------|---------|------|------|------|----------|-------|------|-------|
| Su et al. Eur J Intern Med 2018;57:32-8                       | China | 2018 | Prospective; high-risk            | 40,524    | CKD-EPI | 60.6 | 54.3 | 2.4  | Single   | 20.0% | 6.4% | NR    |
| Wu et al. Scientific Reports 2018;8:2157                      | China | 2018 | Prospective; population-based     | 95,391    | CKD-EPI | 52.0 | 20.1 | 8    | Single   | 14.0% | NR   | 4.3%  |
| Ye et al. BMC Nephrology 2019;20:457                          | China | 2019 | Cross-sectional; high-risk        | 616       | CKD-EPI | 41.8 | 24.0 | 6.4  | Multiple | 25.0% | 1.0% | 12.9% |
| Ye et al. Medicine 2019;98:e14262                             | China | 2019 | Cross-sectional; population-based | 2,969,502 | CKD-EPI | 20.2 | 49.5 | 3    | Single   | 2.8%  | NR   | 0.7%  |
| Liu et al. Ann Transl Med 2020;8:2                            | China | 2020 | Prospective; high-risk            | 8,303     | CKD-EPI | 65.0 | 62.5 | 2    | Single   | 9.7%  | NR   | NR    |
| Prevalence of chronic renal failure in adults in Delhi, India | India | 2005 | Cross-sectional; population-based | 4,712     | NR      | 42.4 | 43.8 | 0.25 | Multiple | 0.8%  | NR   | 4.4%  |
| Unnikrishann et al. Diabetes Care 2007;30:2019-24             | India | 2007 | Cross-sectional; high-risk        | 1,716     | NR      | 51.0 | 56.6 | NR   | Single   | 29.0% | NR   | 29.1% |
| Singh et al. BMC Nephrol 2009;10:4                            | India | 2009 | Cross-sectional; population-based | 5,252     | MDRD    | NR   | 39.9 | NR   | Single   | 4.2%  | 0.4% | 2.2%  |
| Varma et al. Nephrol Dial Transpl 2010;25:3011-7              | India | 2010 | Cross-sectional; population-based | 3,398     | CKD-EPI | 35.6 | 34.0 | 1.4  | Single   | 11.0% | NR   | 9.6%  |
| Varma et al. MJAFI 2011;67:9-14                               | India | 2011 | Cross-sectional; population-based | 1,572     | MDRD    | 34.7 | NR   | 0.58 | Single   | 9.5%  | NR   | 9.9%  |
| Gallieni et al. Nephrol 2013;18:798-07                        | India | 2013 | Cross-sectional; population-based | 1,526     | MDRD    | 51.0 | 57.3 | 1.2  | Single   | 4.1%  | 0.7% | 7.7%  |
| Singh et al. BMC Nephrol 2013;14:114                          | India | 2013 | Cross-sectional; high-risk        | 5,588     | CKD-EPI | 45.2 | 44.9 | 1.9  | Single   | 17.2% | 1.6% | 13.7% |
| Anupama and Uma. Indian J Nephrol 2014;24:214-21              | India | 2014 | Cross-sectional; population-based | 2,091     | MDRD    | 39.9 | 54.4 | 1    | Single   | 6.3%  | 0.0% | 2.9%  |

|                                                                   |           |      |                                   |        |         |      |      |      |          |       |      |       |
|-------------------------------------------------------------------|-----------|------|-----------------------------------|--------|---------|------|------|------|----------|-------|------|-------|
| Anand et al. <i>Kidney Int</i> 2015;88:178-85                     | India     | 2015 | Cross-sectional; population-based | 9,795  | CKD-EPI | 42.6 | 53.5 | 1.2  | Single   | 8.0%  | NR   | 6.6%  |
| Mahapatra et al. <i>Saudi J Kidney Dis Transpl</i> 2016;27:362-70 | India     | 2016 | Cross-sectional; population-based | 1,104  | MDRD    | 43.5 | 38.6 | 0.4  | Single   | 27.7% | 4.4% | 23.5% |
| Trivedi et al. <i>Clin Kidney J</i> 2016;9:438-43                 | India     | 2016 | Cross-sectional; population-based | 2,350  | MDRD    | 48.2 | 38.8 | 0.3  | Single   | 20.9% | 2.2% | 13.8% |
| Anupama et al. <i>J Hum Hypertens</i> 2017;31:327-32              | India     | 2017 | Cross-sectional; population-based | 1,331  | MDRD    | 39.0 | 50.6 | 2    | Single   | 2.6%  | NR   | 3.6%  |
| Rajput et al. <i>J Diab Metabol</i>                               | India     | 2017 | Cross-sectional; high-risk        | 3,000  | MDRD    | 53.4 | 53.9 | 0.7  | Single   | 48.4% | 2.6% | 32.7% |
| Pradeep et al. <i>Urol Nephrol Open Access J</i> 2018;6:167-71    | India     | 2018 | Cross-sectional; population-based | 645    | MDRD    | 40.0 | 39.2 | 3.1  | Single   | 46.7% | 2.0% | 36.3% |
| Tatapudi et al. <i>KI Reports</i> 2019;4:380-9                    | India     | 2019 | Cross-sectional; population-based | 2,210  | MDRD    | 43.2 | 55.7 | NR   | Single   | 18.2% | 5.3% | 9.0%  |
| O'Callaghan-Gordo et al. <i>BMJ Open</i> 2019;9:e023353           | India     | 2019 | Cross-sectional; population-based | 12,500 | CKD-EPI | 41.5 | 56.5 | 4.2  | Single   | 1.6%  | NR   | NR    |
| Mohanty et al. <i>Int J Environ Res and Public Health</i>         | India     | 2020 | Cross-sectional; population-based | 2,978  | MDRD    | NR   | 62.7 | NR   | Single   | 14.3% | NR   | NR    |
| Prodjosudjadi et al. <i>Nephrol</i> 2009;14:669-74                | Indonesia | 2009 | Cross-sectional; population-based | 1,496  | MDRD    | 43.3 | 63.4 | NR   | Single   | 8.6%  | 1.5% | 2.8%  |
| Hosseinpahan et al. <i>BMC Public Health</i> 2009;9:44            | Iran      | 2009 | Cross-sectional; population-based | 10,063 | MDRD    | 42.7 | 58.0 | 3.1  | Multiple | 14.9% | NR   | NR    |
| Najafi et al. <i>PLoS One</i> 2010;5:e14216                       | Iran      | 2010 | Cross-sectional; high-risk        | 3,591  | MDRD    | 43.8 | 61.0 | 1.8  | Single   | 4.6%  | 0.3% | NR    |
| Mahdavi-Mazdeh et al. <i>Renal Failure</i> 2010;32:62-8           | Iran      | 2010 | Cross-sectional; population-based | 31,452 | MDRD    | 43.7 | 1.6  | 0.25 | Single   | 6.5%  | NR   | NR    |



|                                                          |       |      |                                   |         |         |      |      |     |        |       |      |       |
|----------------------------------------------------------|-------|------|-----------------------------------|---------|---------|------|------|-----|--------|-------|------|-------|
| Barahimi et al. Iran J Kidney Dis 2011;5:374-9           | Iran  | 2011 | Cross-sectional; population-based | 1,400   | MDRD    | NR   | 68.4 | NR  | Single | 5.0%  | NR   | 16.2% |
| Najafi et al. Arch Iranian Med 2012;15:70-5              | Iran  | 2012 | Cross-sectional; high-risk        | 1,557   | MDRD    | 56.8 | 53.2 | 1.7 | Single | 23.0% | 0.5% | 5.7%  |
| Malekmakan et al. ISRN Nephrol 2013;2013:427230          | Iran  | 2013 | Cross-sectional; high-risk        | 1,190   | MDRD    | 67.5 | 59.6 | 2.3 | Single | 31.0% | 0.3% | NR    |
| Khajehdehi et al. Iranian J Kidney Dis 2014;8:109-15     | Iran  | 2014 | Cross-sectional; population-based | 9,404   | MDRD    | 39.8 | 64.1 | 2.3 | Single | 11.5% | 0.1% | NR    |
| Naghbi et al. Iranian J Kidney Dis 2015;9:449-53         | Iran  | 2015 | Cross-sectional; population-based | 1,285   | MDRD    | 46.2 | 59.1 | NR  | Single | 5.1%  | NR   | 7.1%  |
| Panahi et al. Iranian J Kidney Dis 2016;10:274-81        | Iran  | 2016 | Prospective; population-based     | 6,507   | CKD-EPI | 47.4 | 56.6 | 2.5 | Single | 19.0% | NR   | NR    |
| Sepanlou et al. PloS One 2017;12:e0176540                | Iran  | 2017 | Prospective; high-risk            | 11,409  | MDRD    | 56.2 | 52.6 | 2   | Single | 24.0% | 0.4% | NR    |
| Bakhshayeshkaram et al. Galen Med J 2018;7:e935          | Iran  | 2018 | Cross-sectional; population-based | 819     | CKD-EPI | 43.0 | 58.5 | 0.9 | Single | 16.6% | 1.1% | NR    |
| Mahmoodpoor et al. J Renal Inj Prev 2018;7:124-8         | Iran  | 2018 | Cross-sectional; population-based | 898     | MDRD    | 49.2 | 54.8 | 0.3 | Single | 7.9%  | 0.0% | NR    |
| Piri-Ardakani et al. Ann Med Health Sci Res 2018;8:26670 | Iran  | 2018 | Cross-sectional; population-based | 1,800   | MDRD    | 35.5 | 4.1  | NR  | Single | 10.3% | 0.0% | 6%    |
| Nakamura et al. Circ J 2006;70:954-9                     | Japan | 2006 | Prospective; population-based     | 7,316   | MDRD    | 52.4 | 58.4 | 10  | Single | 7.0%  | 0.2% | NR    |
| Iseki et al. Hypertens Res 2007;30:55-62                 | Japan | 2007 | Prospective; population-based     | 154,019 | MDRD    | 49.9 | 52.0 | 1   | Single | 11.0% | 0.3% | 4.3%  |
| Koganei et al. Circ J 2008;72:179-85                     | Japan | 2008 | Prospective; high-risk            | 1,706   | MDRD    | 63.3 | 24.2 | 2.4 | Single | 42.0% | 4.9% | NR    |

|                                                    |       |      |                                   |         |                 |      |      |      |        |       |       |       |
|----------------------------------------------------|-------|------|-----------------------------------|---------|-----------------|------|------|------|--------|-------|-------|-------|
| Iguchi et al. Am J Cardiol 2008;102:1056-9         | Japan | 2008 | Prospective; high-risk            | 41,417  | MDRD            | NR   | 66.3 | 0.7  | Single | 67.0% | NR    | NR    |
| Nakamura et al. Hypertens Res 2009;32:920-6        | Japan | 2009 | Prospective; high-risk            | 797     | Other           | 64.8 | 22.1 | 2.8  | Single | 29.0% | 5.9%  | NR    |
| Takamatsu et al. BMC Nephrol 2009;10:34            | Japan | 2009 | Cross-sectional; population-based | 1,554   | MDRD            | 62.1 | 63.1 | NR   | Single | 8.0%  | NR    | NR    |
| Hamaguchi et al. Circ J 2009;73:1442-7             | Japan | 2009 | Prospective; high-risk            | 2,013   | MDRD            | 71.5 | 41.3 | NR   | Single | 71.0% | 20.3% | NR    |
| Higashiyama et al. Hypertens Res 2009;32:450-4     | Japan | 2009 | Prospective; high-risk            | 4,026   | Other           | 63.1 | 56.9 | NR   | Single | 18.0% | NR    | NR    |
| Kohagura et al. Clin Exp Nephrol 2009;13:614-20    | Japan | 2009 | Prospective; population-based     | 94,602  | Other           | 54.7 | 58.0 | 1    | Single | 16.0% | 0.2%  | NR    |
| Imai et al. Clin Exp Nephrol 2009;13:621-30        | Japan | 2009 | Cross-sectional; population-based | 574,024 | Other           | NR   | 58.1 | NR   | Single | 13.2% | 0.1%  | NR    |
| Kiyosue et al. Circ J 2010;74:786-91               | Japan | 2010 | Prospective; high-risk            | 572     | MDRD            | 66.4 | 28.0 | 3    | Single | 28.0% | NR    | NR    |
| Bouchi et al. Hypertens Res 2010;33:1298-304       | Japan | 2010 | Prospective; high-risk            | 1,002   | MDRD            | 60.8 | 45.1 | 5.2  | Single | 25.0% | 4.7%  | 43.2% |
| Nagata et al. Nephrol Dial Transpl 2010;25:2557-64 | Japan | 2010 | Cross-sectional; high-risk        | 3,297   | MDRD            | 61.6 | 57.1 | NR   | Single | 18.0% | NR    | NR    |
| Yano et al. Atherosclerosis 2011;219:273-9         | Japan | 2011 | Prospective; high-risk            | 514     | Cockcroft-Gault | 72.2 | 62.8 | 3.4  | Single | 44.0% | NR    | NR    |
| Takata et al. Aging Clin Exp Res 2011;23:223-30    | Japan | 2011 | Prospective; high-risk            | 595     | Other           | NR   | 48.9 | NR   | Single | 69.0% | NR    | NR    |
| Konishi et al. Circ J 2011;75:2372-8               | Japan | 2011 | Prospective; high-risk            | 1,809   | Other           | 59.3 | 15.0 | 11.4 | Single | 17.7% | NR    | NR    |

|                                                          |       |      |                                   |        |       |      |      |     |          |       |      |       |
|----------------------------------------------------------|-------|------|-----------------------------------|--------|-------|------|------|-----|----------|-------|------|-------|
| Kudo et al. Clin Exp Nephrol 2011;15:235-41              | Japan | 2011 | Prospective; high-risk            | 3,444  | MDRD  | 62.5 | 54.9 | 2.5 | Single   | 6.8%  | NR   | 14.9% |
| Miyatake et al. Environ Health Prev Med 2011;3:191-5     | Japan | 2011 | Cross-sectional; population-based | 11,030 | Other | 42.6 | 68.6 | 9   | Single   | 6.0%  | NR   | 2.4%  |
| Shimizu et al. Stroke 2011;42:2531-7                     | Japan | 2011 | Prospective; high-risk            | 11,780 | Other | 53.8 | 61.2 | 17  | Single   | 11.0% | NR   | NR    |
| Kudo et al. Clin Exp Nephrol 2012;16:564-9               | Japan | 2012 | Prospective; high-risk            | 525    | Other | 74.1 | 50.1 | 1   | Single   | 48.0% | NR   | 25.5% |
| Hanai et al. Nephrol Dial Transpl 2012;27:1070-5         | Japan | 2012 | Prospective; high-risk            | 723    | Other | 63.0 | 38.7 | 4.3 | Multiple | 34.0% | NR   | 34.0% |
| Kuwashiro et al. Cerebrovasc Dis 2012;33:141-9           | Japan | 2012 | Prospective; high-risk            | 876    | Other | 69.8 | 38.7 | 1   | Single   | 37.5% | NR   | NR    |
| Dan et al. Circ J 2012;76:2266-72                        | Japan | 2012 | Prospective; high-risk            | 1,177  | MDRD  | 69.1 | 26.0 | 3.2 | Single   | 45.6% | 3.6% | NR    |
| Ohno et al. Kidney Blood Press Res 2012;36:139-48        | Japan | 2012 | Cross-sectional; high-risk        | 39,211 | Other | 58.6 | 70.3 | NR  | Single   | 20.0% | NR   | NR    |
| Wakasugi et al. Clin Exp Nephrol 2012;16:259-68          | Japan | 2012 | Cross-sectional; high-risk        | 49,261 | Other | 51.6 | 57.1 | NR  | Single   | 10.0% | NR   | NR    |
| Furukawa et al. Eur J Endocrinol 2013;169:239-46         | Japan | 2013 | Prospective; high-risk            | 513    | NR    | 62.0 | 43.1 | NR  | Single   | 32.0% | NR   | 23.6% |
| Yano et al. Am J Nephrol 2013;38:195-203                 | Japan | 2013 | Prospective; high-risk            | 1,276  | Other | 74.2 | 60.2 | NR  | Single   | 50.0% | NR   | NR    |
| Konta et al. Clin Exp Nephrol 2013;17:805-10             | Japan | 2013 | Prospective; high-risk            | 3,445  | NR    | 62.6 | 55.1 | 6.2 | Multiple | 15.0% | NR   | 14.9% |
| Noborisaka et al. Environ Health Prev Med 2013;18:466-76 | Japan | 2013 | Cross-sectional; population-based | 6,662  | Other | NR   | 40.5 | NR  | Multiple | 18.0% | 0.2% | 2.2%  |

|                                                        |       |      |                                   |         |       |      |      |      |          |       |      |       |
|--------------------------------------------------------|-------|------|-----------------------------------|---------|-------|------|------|------|----------|-------|------|-------|
| Yamada et al. Arch Gerontol Geriatr 2013;57:328-32     | Japan | 2013 | Prospective; high-risk            | 8,063   | MDRD  | NR   | 59.2 | 2    | Multiple | 24.0% | NR   | NR    |
| Shimizu et al. Atherosclerosis 2014;2014:233:525-9     | Japan | 2014 | Cross-sectional; population-based | 4,133   | Other | 64.5 | 63.9 | 7    | Single   | 30.0% | NR   | NR    |
| Ishida et al. J Hypertension 2014;32:1435-43           | Japan | 2014 | Cross-sectional; population-based | 13,189  | Other | 53.1 | 53.3 | 6.7  | Single   | 12.0% | NR   | 7.1%  |
| Tsuruya et al. Atherosclerosis 2014;233:260-7          | Japan | 2014 | Cross-sectional; population-based | 216,007 | NR    | 63.8 | 59.0 | 2    | Single   | 14.0% | NR   | NR    |
| Tanaka et al. Nephrology 2015;20:531-8                 | Japan | 2015 | Prospective; high-risk            | 3,231   | Other | 59.1 | 38.7 | 2    | Single   | 43.0% | 2.4% | 35.1% |
| Nagai et al. PLoS One 2019;11:e0156792                 | Japan | 2016 | Prospective; high-risk            | 89,547  | MDRD  | 58.6 | 66.1 | 17.1 | Single   | 16.8% | 0.1% | NR    |
| Nakahashi et al. Heart Vessels 2017;32:22-9            | Japan | 2017 | Prospective; high-risk            | 577     | Other | 64.4 | 21.3 | 3    | Single   | 31.0% | NR   | NR    |
| Hara et al. Clin Exp Nephrol 2017;21:275-82            | Japan | 2017 | Cross-sectional; high-risk        | 661     | MDRD  | 46.0 | 9.5  | 8.7  | Multiple | 8.5%  | NR   | NR    |
| Tokoroyama et al. Nephrol Dial Transpl 2017;32:2035-42 | Japan | 2017 | Cross-sectional; high-risk        | 1,077   | Other | 63.8 | 77.2 | 4.3  | Single   | 25.0% | 0.9% | NR    |
| Esato et al. Chest 2017;152:1266-75                    | Japan | 2017 | Prospective; high-risk            | 3,749   | NR    | 73.6 | 40.7 | 4.8  | NR       | 35.3% | NR   | NR    |
| Hirata et al. Eur J Prev Cardiol 2017;24:505-23        | Japan | 2017 | Cross-sectional; high-risk        | 7,229   | Other | 52.5 | 58.4 | NR   | Multiple | 6.0%  | NR   | NR    |
| Nishikawa et al. Clin Exp Nephrol 2017;21:316-23       | Japan | 2017 | Prospective; high-risk            | 13,911  | Other | 49.3 | 0.0  | 7.6  | Single   | 10.4% | 0.2% | NR    |
| Yokomichi et al. J Epidemiol 2017;27:S98-106           | Japan | 2017 | Cross-sectional; high-risk        | 30,834  | NR    | 63.7 | 35.7 | 8    | Multiple | 31.9% | NR   | NR    |

|                                                                    |          |      |                                   |        |                 |      |      |     |          |       |       |       |
|--------------------------------------------------------------------|----------|------|-----------------------------------|--------|-----------------|------|------|-----|----------|-------|-------|-------|
| Dan et al. <i>Cardiorenal Med</i> 2018;8:151-9                     | Japan    | 2018 | Cross-sectional; high-risk        | 504    | MDRD            | 72.0 | 26.0 | 2   | Single   | 49.0% | 12.0% | NR    |
| Matsumoto et al. <i>World J Urol</i> 2018;36:                      | Japan    | 2018 | Cross-sectional; high-risk        | 594    | Other           | 67.1 | 18.9 | 24  | Single   | 35.0% | 5.6%  | NR    |
| Yanagisawa et al. <i>Heart Rhythm</i> 2018;15:348-54               | Japan    | 2018 | Cross-sectional; high-risk        | 2,091  | Cockcroft-Gault | 63.1 | 26.2 | 9.2 | Single   | 11.0% | 1.1%  | NR    |
| Kuwabara et al. <i>Nutrients</i> 2018;10:1011                      | Japan    | 2018 | Cross-sectional; population-based | 90,047 | MDRD            | 46.3 | 50.9 | 6   | Single   | 5.7%  | NR    | NR    |
| Kichikawa et al. <i>Cardiovasc Intervent Radiol</i> 2019;42:358-64 | Japan    | 2019 | Prospective; high-risk            | 905    | NR              | 73.5 | 29.7 | 2   | Single   | 43.6% | NR    | NR    |
| Fujii et al. <i>Nephrol</i> 2019;24:670-73                         | Japan    | 2019 | Cross-sectional; population-based | 11,283 | Other           | 56.0 | 54.3 | NR  | Single   | 8.3%  | NR    | NR    |
| Toda et al. <i>Nephron</i> 2019;142:91-7                           | Japan    | 2019 | Cross-sectional; population-based | 16,390 | MDRD            | 54.0 | 32.2 | NR  | Single   | 16.2% | NR    | 7.3%  |
| Kashihara et al. <i>Kidney Int Rep</i> 2019;4:1248-60              | Japan    | 2019 | Cross-sectional; high-risk        | 25,395 | NR              | 72.4 | 45.0 | 9.5 | Single   | 56.4% | 27.3% | NR    |
| Nagai et al. <i>PLoS One</i> 2019;14:e0216432                      | Japan    | 2019 | Cross-sectional; high-risk        | 70,627 | Other           | NR   | 54.3 | 2   | Single   | 16.5% | NR    | NR    |
| Tsuyuki et al. <i>Thromb Res</i> 2020;187:39-47                    | Japan    | 2020 | Cross-sectional; high-risk        | 2,829  | Other           | 67.5 | 62.0 | 4.7 | Single   | 38.0% | 6.0%  | NR    |
| Hooi et al. <i>Kidney Int</i> 2013;84:1034-40                      | Malaysia | 2013 | Cross-sectional; population-based | 876    | CKD-EPI         | 42.9 | 52.1 | 0.3 | Multiple | 9.0%  | 0.6%  | 13.2% |
| Abougambou et al. <i>Diabetes Metab Syndr</i> 2013;7:64-7          | Malaysia | 2013 | Prospective; high-risk            | 1,066  | NR              | NR   | 55.8 | 1   | Single   | 25.4% | NR    | 25.7% |
| Ismail et al. <i>BMC Cardiovasc Disord</i> 2018;18:184             | Malaysia | 2018 | Cross-sectional; high-risk        | 6,563  | MDRD            | 55.4 | 12.2 | 7   | Single   | 23.1% | NR    | NR    |

|                                                                            |             |      |                                   |        |         |      |      |     |          |       |       |       |
|----------------------------------------------------------------------------|-------------|------|-----------------------------------|--------|---------|------|------|-----|----------|-------|-------|-------|
| Saminathan et al. BMC Nephrol 2020;21:344                                  | Malaysia    | 2020 | Cross-sectional; population-based | 890    | CKD-EPI | 48.8 | 58.9 | 0.8 | Multiple | 15.5% | 0.33% | 16.9% |
| Sharma et al. Am J Kidney Dis 2010;56:915-27                               | Mongolia    | 2010 | Cross-sectional; population-based | 997    | MDRD    | 40.0 | 74.0 | NR  | Single   | 7.8%  | 1.6%  | 6.2%  |
| Sharma et al. Am J Kidney Dis 2010;56:915-27                               | Nepal       | 2010 | Cross-sectional; population-based | 8,397  | MDRD    | NR   | 38.2 | 1   | Single   | 14.0% | 0.3%  | 7.4%  |
| Cravedi et al. BMJ Open 2012;2:e001357                                     | Nepal       | 2012 | Cross-sectional; population-based | 20,811 | MDRD    | 39.0 | 61.5 | 1   | Single   | 18.9% | 0.3%  | 7.1%  |
| Sharma et al. J Nepal Med Assoc 2013;52:205-12                             | Nepal       | 2013 | Cross-sectional; population-based | 1,000  | MDRD    | 42.9 | 52.1 | 2   | Single   | 10.6% | NR    | 5.1%  |
| Jafar et al. Nephrol Dial Transpl 2009;24:2111-6                           | Pakistan    | 2009 | Cross-sectional; high-risk        | 2,891  | MDRD    | 51.5 | 52.3 | NR  | Single   | 12.3% | 8.0%  | 12.3% |
| Ishtiaque et al. PLoS One 2014;9:e85652                                    | Pakistan    | 2014 | Cross-sectional; population-based | 1,624  | NR      | NR   | 49.0 | 3.5 | Single   | 17.0% | NR    | 16.9% |
| Jessani et al. BMC Nephrol 2014;15:90                                      | Pakistan    | 2014 | Cross-sectional; high-risk        | 2,873  | CKD-EPI | 51.5 | 52.2 | 1   | Single   | 12.5% | NR    | 9.4%  |
| Feng et al. Nephrol Dial Transplant 2019;34:1723-30                        | Pakistan    | 2019 | Cross-sectional; high-risk        | 685    | CKD-EPI | 56.7 | 60.7 | 2   | Single   | 16.9% | 0.9%  | 16.1% |
| NNHeS renal report <a href="http://goo.gl/XKADci">http://goo.gl/XKADci</a> | Philippines | 2003 | Cross-sectional; population-based | NR     | MDRD    | NR   | NR   | 2   | Single   | NR    | 2.6%  | NR    |
| Nang et al. Am J Epidemiol 2009;169:1456-62                                | Singapore   | 2009 | Cross-sectional; population-based | 8,469  | MDRD    | 49.7 | 51.8 | 3   | Single   | 53.0% | NR    | 10.5% |
| Sabanayagam et al. Nephrol Dial Transpl 2010;25:2564-70                    | Singapore   | 2010 | Cross-sectional; population-based | 4,499  | MDRD    | 49.7 | 51.9 | NR  | Single   | 15.6% | 1.5%  | 12%   |
| Tay et al. Acta Cardiol 2010;65:211-6                                      | Singapore   | 2010 | Prospective; high-risk            | 5,529  | MDRD    | 62.9 | 29.0 | 14  | Single   | 35.0% | 9.0%  | NR    |

|                                                      |             |      |                                   |         |         |      |      |     |          |       |      |       |
|------------------------------------------------------|-------------|------|-----------------------------------|---------|---------|------|------|-----|----------|-------|------|-------|
| Feng et al. J Am Geriatr Soc 2012;60:1208-14         | Singapore   | 2012 | Prospective; high-risk            | 1,315   | MDRD    | 65.6 | 66.2 | 4   | Single   | 17.0% | NR   | NR    |
| Low et al. Ann Acad Med Singapore 2015;44:164-71     | Singapore   | 2015 | Cross-sectional; high-risk        | 1,861   | MDRD    | 57.5 | 49.9 | 2.3 | Single   | 53.0% | 5.5% | 48%   |
| Lew et al. Nephron 2018;138:202-13                   | Singapore   | 2018 | Cross-sectional; high-risk        | 88,765  | CKD-EPI | 65.9 | 53.3 | 4   | Multiple | 25.9% | 2.1% | 13.8% |
| Han et al. BMC Nephrol 2009;10:39                    | South Korea | 2009 | Cross-sectional; high-risk        | 944     | MDRD    | 76.0 | 54.9 | 3   | Single   | 46.6% | NR   | 8.4%  |
| Shin et al. BMC Nephrol 2011;12:29                   | South Korea | 2011 | Cross-sectional; high-risk        | 1,363   | MDRD    | 55.6 | 50.9 | 5   | Single   | 26.0% | 6.7% | NR    |
| Yang et al. Nephrol Dial Transplant 2011;26:3249-255 | South Korea | 2011 | Cross-sectional; high-risk        | 3,712   | MDRD    | 62.0 | 54.8 | NR  | Single   | 29.0% | NR   | 29.4% |
| KNHANES 2011 $\alpha$                                | South Korea | 2011 | Prospective; population-based     | 5,428   | CKD-EPI | NR   | NR   | 4   | Single   | 17.4% | 3.8% | 7.1%  |
| Park et al. Cardiovasc Therapeutics 2012;30:5-11     | South Korea | 2012 | Cross-sectional; high-risk        | 1,431   | MDRD    | 63.4 | 33.9 | NR  | Single   | 27.5% | NR   | NR    |
| Kim et al. BMC Public Health 2012;12:960             | South Korea | 2012 | Prospective; high-risk            | 9,509   | Other   | 52.1 | 52.0 | 2   | Single   | 13.0% | 0.1% | 2.3%  |
| Kweon et al. Diabetes Res Clin Pract 2012;3:492-8    | South Korea | 2012 | Cross-sectional; high-risk        | 10,534  | MDRD    | NR   | 60.7 | 3   | Single   | 26.0% | NR   | 25.5% |
| Choi et al. Nephrol Dial Transplant 2012;27:3868-74  | South Korea | 2012 | Cross-sectional; high-risk        | 11,050  | CKD-EPI | 63.5 | 29.5 | 2.8 | Single   | 27.0% | 5.9% | NR    |
| Oh et al. Nephrol Dial Transpl 2012;27:2284-90       | South Korea | 2012 | Cross-sectional; population-based | 112,115 | MDRD    | 49.0 | 46.3 | 6   | Single   | 3.0%  | NR   | NR    |
| Kim et al. Jap J Clin Oncol 2013;43:1243-48          | South Korea | 2013 | Cross-sectional; high-risk        | 1,928   | MDRD    | 54.9 | 30.7 | 11  | Multiple | 10.0% | NR   | NR    |

|                                                     |             |      |                                   |         |         |      |      |      |          |       |      |       |
|-----------------------------------------------------|-------------|------|-----------------------------------|---------|---------|------|------|------|----------|-------|------|-------|
| Hwang et al. Am J Nephrol 2014;40:345-52            | South Korea | 2014 | Prospective; high-risk            | 4,738   | CKD-EPI | 62.6 | 28.5 | 6    | Single   | 25.0% | NR   | NR    |
| Mok et al. PLoS One 2016;11:e0153429                | South Korea | 2016 | Cross-sectional; population-based | 367,932 | CKD-EPI | 41.7 | 28.0 | 8    | Single   | 1.0%  | NR   | 3.7%  |
| Lee et al. J Clin Sleep Med 2017;13:1145-52         | South Korea | 2017 | Cross-sectional; population-based | 1,732   | CKD-EPI | 54.0 | 14.4 | 15   | Single   | 7.4%  | NR   | 4.8%  |
| Kim et al. Medicine 2018;97:e13099                  | South Korea | 2018 | Cross-sectional; high-risk        | 724     | MDRD    | 50.0 | 49.0 | 16.2 | Single   | 10.0% | NR   | 7%    |
| Kim et al. Int J Cardiol 2018;262:32-7              | South Korea | 2018 | Cross-sectional; high-risk        | 3,434   | MDRD    | 68.7 | 33.3 | 9.6  | Single   | 7.9%  | 2.5% | NR    |
| Cha et al. Circ J 2018;82:2970-5                    | South Korea | 2018 | Cross-sectional; high-risk        | 12,876  | MDRD    | 64.9 | 36.5 | 3    | Multiple | 28.8% | NR   | NR    |
| Lim et al. J Viral Hepa 2019;27:316-22              | South Korea | 2019 | Cross-sectional; high-risk        | 640     | CKD-EPI | 63.4 | 40.5 | NR   | Single   | 0.8%  | NR   | NR    |
| Athuraliya et al. Kidney Int 2011;80:1212-21        | Sri Lanka   | 2011 | Cross-sectional; population-based | 6,153   | MDRD    | NR   | 53.0 | NR   | Single   | 4.0%  | NR   | NR    |
| Jayasekara et al. J Epidemiol 2015;25:275-80        | Sri Lanka   | 2015 | Cross-sectional; population-based | 87,486  | MDRD    | NR   | 48.8 | 2    | Multiple | 17.9% | NR   | NR    |
| Weeraratna et al. BioMed Res Int 2018;8178043       | Sri Lanka   | 2018 | Cross-sectional; high-risk        | 2,434   | MDRD    | 52.0 | 35.8 | 3    | Single   | 16.2% | NR   | 83.5% |
| Feng et al. Nephrol Dial Transplant 2019;34:1723-30 | Sri Lanka   | 2019 | Cross-sectional; high-risk        | 796     | CKD-EPI | 62.9 | 68.3 | 2    | Single   | 58.3% | 2.4% | 44.3% |
| Ranasinghe et al. BMC Nephrol 2019;20:338           | Sri Lanka   | 2019 | Cross-sectional; population-based | 30,566  | CKD-EPI | 57.3 | 37.1 | 7    | Single   | 1.8%  | NR   | NR    |
| Hsu et al. Am J Kidney Dis 2006;48:727-38           | Taiwan      | 2006 | Cross-sectional; population-based | 6,001   | MDRD    | NR   | 50.9 | NR   | Single   | 6.0%  | NR   | NR    |
| Chou et al. Int Med J 2008;38:402-6                 | Taiwan      | 2007 | Cross-sectional; high-risk        | 984     | MDRD    | 66.7 | 45.4 | 2    | Single   | 16.0% | NR   | NR    |



|                                                     |        |      |                                   |         |                 |      |      |     |          |       |      |       |
|-----------------------------------------------------|--------|------|-----------------------------------|---------|-----------------|------|------|-----|----------|-------|------|-------|
| Kang et al. J Occup Environ Med 2007;49:776-9       | Taiwan | 2007 | Cross-sectional; population-based | 3,552   | MDRD            | 53.6 | 60.1 | 3   | Single   | 6.0%  | NR   | NR    |
| Chen et al. Maturitas 2008;59:55-61                 | Taiwan | 2008 | Cross-sectional; high-risk        | 852     | MDRD            | 64.6 | 56.7 | NR  | Single   | 30.9% | NR   | NR    |
| Wu et al. Am J Med Sci 2008;336:303-8               | Taiwan | 2008 | Cross-sectional; high-risk        | 1,133   | Cockcroft-Gault | 60.7 | 33.1 | 12  | Multiple | 34.7% | 5.2% | NR    |
| Cheng et al. Am J Kidney Dis 2008;52:1051-60        | Taiwan | 2008 | Prospective; high-risk            | 17,026  | MDRD            | 57.2 | 23.7 | 5   | Multiple | 7.0%  | NR   | NR    |
| Wen et al. Lancet 2008;371:2173-82                  | Taiwan | 2008 | Prospective; population-based     | 462,293 | MDRD            | 41.8 | 50.2 | 13  | Multiple | 11.9% | 0.2% | 7.9%  |
| Tseng. Clin Biochem 2009;42:1019-24                 | Taiwan | 2009 | Cross-sectional; high-risk        | 549     | Cockcroft-Gault | 63.4 | 55.4 | 2.7 | Single   | 54.0% | NR   | 54.3% |
| Lin et al. Nephrol Dial Transplant 2010;25:3230-235 | Taiwan | 2010 | Cross-sectional; high-risk        | 7,868   | MDRD            | 72.4 | 39.1 | 3   | Single   | 43.0% | 2.3% | NR    |
| Hsu et al. Nephrology 2011;16:751-7                 | Taiwan | 2011 | Cross-sectional; high-risk        | 27,482  | MDRD            | 58.0 | 56.4 | 7   | Single   | 16.0% | NR   | 10.2% |
| Lin et al. PLoS One 2012;7:e47960                   | Taiwan | 2012 | Prospective; high-risk            | 2,350   | MDRD            | NR   | 51.4 | 2.8 | Multiple | 13.0% | NR   | 12.9% |
| Lin et al. Cardiovasc Diabetol 2012;11:131          | Taiwan | 2012 | Prospective; high-risk            | 6,523   | MDRD            | 58.9 | 48.0 | 6   | Multiple | 13.0% | NR   | 34.6% |
| Hsieh et al. Cerebrovascular Disease 2014;37:51-6   | Taiwan | 2014 | Prospective; high-risk            | 657     | MDRD            | 67.3 | 37.9 | 5   | Single   | 36.0% | NR   | NR    |
| Lin et al. Biomed Res Int 2014;2014:841497          | Taiwan | 2014 | Cross-sectional; high-risk        | 2,359   | MDRD            | 56.9 | 51.4 | 9   | Single   | 4.0%  | NR   | 12.9% |
| Lin et al. BMC Nephrol 2014;15:66                   | Taiwan | 2014 | Prospective; high-risk            | 3,093   | CKD-EPI         | 63.1 | 21.8 | NR  | Single   | 40.0% | NR   | NR    |
| Li et al. Intern Med J 2014;44:645-52               | Taiwan | 2014 | Cross-sectional; population-based | 41,600  | MDRD            | 37.9 | 44.5 | 2   | Single   | 1.0%  | NR   | NR    |

|                                                     |        |      |                                   |         |         |      |      |      |        |       |       |      |
|-----------------------------------------------------|--------|------|-----------------------------------|---------|---------|------|------|------|--------|-------|-------|------|
| Hsieh et al. J stroke Cerebrovasc Dis 2015;24:673-9 | Taiwan | 2015 | Prospective; high-risk            | 929     | CKD-EPI | 64.7 | 32.4 | NR   | Single | 39.0% | NR    | NR   |
| Lin et al. Heart Vess 2015;30:441-50                | Taiwan | 2015 | Prospective; high-risk            | 2,819   | MDRD    | 62.9 | 20.9 | NR   | Single | 34.0% | NR    | NR   |
| Tsai et al. Eur J Clin Nutr 2015;69:34-9            | Taiwan | 2015 | Cross-sectional; population-based | 3,473   | MDRD    | 36.0 | 48.1 | 0.4  | Single | 2.0%  | NR    | 0.5% |
| Yeh et al. Atherosclerosis 2015;239:328-34          | Taiwan | 2015 | Prospective; high-risk            | 8,052   | CKD-EPI | 68.5 | 38.6 | 3    | Single | 41.0% | 8.3%  | NR   |
| Chang et al. Acta Cardiol Sin 2015;31:106-12        | Taiwan | 2015 | Cross-sectional; population-based | 63,129  | MDRD    | NR   | 62.5 | 4    | Single | 14.8% | 0.6%  | 7.4% |
| Chua et al. Nephrol 2016;21:583-91                  | Taiwan | 2016 | Prospective; high-risk            | 3,031   | CKD-EPI | 64.0 | 21.3 | 1.2  | Single | 38.0% | NR    | NR   |
| Chu et al. J Am Coll Cardiol 2016;67:S58            | Taiwan | 2016 | Cross-sectional; high-risk        | 74,431  | NR      | NR   | NR   | 13   | NR     | 1.9%  | NR    | NR   |
| Lin et al. BMC Cardiovasc Discord 2017;17:242       | Taiwan | 2017 | Prospective; high-risk            | 1,394   | NR      | 64.0 | 26.3 | 7.7  | Single | 45.0% | 15.7% | NR   |
| Lai et al. Kidney Int 2017;92:703-9                 | Taiwan | 2017 | Prospective; population-based     | 13,805  | CKD-EPI | 47.5 | 52.2 | 2    | Single | 3.3%  | NR    | NR   |
| Li et al. BMJ Open 2018;8:e021655                   | Taiwan | 2018 | Cross-sectional; high-risk        | 665     | MDRD    | 62.2 | 43.5 | 11.1 | Single | 34.4% | NR    | NR   |
| Chen et al. Environ Pollut 2018;234:838-45          | Taiwan | 2018 | Cross-sectional; high-risk        | 8,497   | CKD-EPI | 74.2 | 49.0 | 0.5  | Single | 27.8% | NR    | 9%   |
| Lai et al. Family Pract 2018;35:259-65              | Taiwan | 2018 | Cross-sectional; population-based | 24,826  | MDRD    | 40.6 | 23.2 | 2.9  | Single | 3.4%  | NR    | 3%   |
| Wang et al. Atherosclerosis 2018;269:288-93         | Taiwan | 2018 | Cross-sectional; high-risk        | 52,752  | CKD-EPI | 69.5 | 38.6 | 9.8  | Single | 38.0% | 8.4%  | NR   |
| Tsai et al. Nephron 2018;140:175-84                 | Taiwan | 2018 | Prospective; population-based     | 106,094 | CKD-EPI | 47.7 | 60.3 | 11   | Single | 9.0%  | 0.6%  | 6.2% |

|                                                          |          |      |                                   |        |                 |      |      |     |        |       |      |       |
|----------------------------------------------------------|----------|------|-----------------------------------|--------|-----------------|------|------|-----|--------|-------|------|-------|
| Chang et al. BMC Neurol 2019;19:180                      | Taiwan   | 2019 | Prospective; high-risk            | 686    | Cockcroft-Gault | NR   | 36.4 | 2   | Single | 49.6% | 8.0% | NR    |
| Taiwan individual participant data                       | Taiwan   | 2007 | Cross-sectional; population-based | 3142   | CKD-EPI         | 47.7 | 51.4 | 1   | Single | 16.8% | 0.9% | 13.1% |
| Domrongkitchaiporn et al. J Am Soc Nephrol 2005;16:791-9 | Thailand | 2005 | Prospective; population-based     | 3,499  | MDRD            | 54.9 | 24.1 | 12  | Single | 6.8%  | NR   | 2.4%  |
| Chittinandana et al J Med Assoc Thai 2006;89:S112-20     | Thailand | 2006 | Cross-sectional; population-based | 15,312 | MDRD            | 45.7 | 16.6 | 2   | Single | 4.7%  | 0.2% | NR    |
| Perkovic et al. Kidney Int 2008;73:473-9                 | Thailand | 2008 | Cross-sectional; population-based | 5,099  | MDRD            | NR   | 60.4 | NR  | Single | 14.0% | 0.6% | NR    |
| Ingsathit et al. Nephrol Dial Transplant 2010;25:1567-75 | Thailand | 2010 | Cross-sectional; population-based | 3,459  | MDRD            | NR   | 54.6 | 0.9 | Single | 14.4% | 1.1% | NR    |
| Zaman et al. Diabetes Res Clin Pract 2018;138:238-45     | Thailand | 2018 | Cross-sectional; high-risk        | 3,748  | CKD-EPI         | 61.4 | 64.7 | 0.5 | Single | 25.0% | NR   | NR    |
| Jitraknatee et al. Sci Rep 2020;10:6205                  | Thailand | 2020 | Cross-sectional; high-risk        | 1,094  | CKD-EPI         | 61.6 | 57.1 | 1   | Single | 24.4% | 6.1% | 52.9% |
| Ito et al. Nephron Clin Pract 2008;109:c25-32            | Vietnam  | 2008 | Cross-sectional; high-risk        | 8,505  | MDRD            | 57.2 | 64.8 | NR  | Single | 4.7%  | 0.2% | NR    |
| Tran et al. BMC Res Notes 2017;10:523                    | Vietnam  | 2017 | Cross-sectional; population-based | 2,037  | MDRD            | 42.3 | 54.4 | NR  | Single | 12.8% | 0.1% | 11.4% |

eGFR=estimated glomerular filtration rate; CKD-EPI=chronic kidney disease epidemiology equation; MDRD=Modification of Diet in Renal Disease equation; NR=not reported; N/A=not applicable

**Supplementary appendix 4: Quality assessment of the included studies<sup>^</sup>**

| <b>Study</b>                                           | <b>Representativeness of the sample</b> | <b>Sample size</b> | <b>Comparability of characteristics</b> | <b>Definition of CKD</b> | <b>Quality of descriptive statistics reporting</b> | <b>Total score</b> |
|--------------------------------------------------------|-----------------------------------------|--------------------|-----------------------------------------|--------------------------|----------------------------------------------------|--------------------|
| Cravedi et al. BMJ Open 2012;2:e001357                 | 1                                       | 0                  | 0                                       | 1                        | 1                                                  | 3                  |
| Fatema et al. Saudi J Kidney Dis Transpl 2013;3:534-41 | 1                                       | 0                  | 0                                       | 1                        | 1                                                  | 3                  |
| Khanam et al. J Diabetol 2016;3:2                      | 0                                       | 0                  | 1                                       | 1                        | 1                                                  | 3                  |
| Feng et al. Nephrol Dial Transplant 2019;34:1723-30    | 0                                       | 0                  | 0                                       | 1                        | 1                                                  | 2                  |
| Das et al. PLoS One 2019;14:e0214568                   | 1                                       | 1                  | 1                                       | 1                        | 1                                                  | 5                  |
| Chen et al. Kidney Int 2005;68:2837-45                 | 1                                       | 1                  | 1                                       | 1                        | 1                                                  | 5                  |
| Li et al. Clinica Chimica Acta 2006;366:209-215        | 1                                       | 0                  | 0                                       | 1                        | 1                                                  | 3                  |
| Liu et al. Clinc Chim Acta 2008;387:128-32             | 0                                       | 1                  | 1                                       | 1                        | 1                                                  | 4                  |
| Sharma et al. Am J Kidney Dis 2010;56:915-27           | 0                                       | 1                  | 0                                       | 1                        | 1                                                  | 3                  |
| Chen et al. Clinica Chimica Acta 2010;411:705-9        | 1                                       | 0                  | 1                                       | 1                        | 1                                                  | 4                  |
| Shan et al. Nephrol 2010 15:354-61                     | 1                                       | 1                  | 0                                       | 0                        | 1                                                  | 3                  |
| Luo et al. Vasc Med 2010;15:107-12                     | 0                                       | 1                  | 1                                       | 1                        | 1                                                  | 4                  |
| Wang et al. Nephrol Dial Transpl 2010;25:3924-31       | 1                                       | 1                  | 1                                       | 1                        | 1                                                  | 5                  |
| Xu et al. Nephrol Dial Transpl 2011;26:2590-4          | 0                                       | 0                  | 1                                       | 1                        | 1                                                  | 3                  |
| Chen et al. Nephrol Dial Transpl 2011;26:1592-9        | 1                                       | 0                  | 0                                       | 1                        | 1                                                  | 3                  |
| Wang. J Int Med Res 2012;40:1317-24                    | 0                                       | 0                  | 0                                       | 0                        | 0                                                  | 0                  |
| Liu et al. Scand J Urol Nephrol 2012;46:142-7          | 0                                       | 0                  | 1                                       | 1                        | 1                                                  | 3                  |
| Chan et al. J Am Med Dir Assoc 2012;13:630-3           | 0                                       | 0                  | 0                                       | 1                        | 1                                                  | 2                  |
| Liu et al. PLoS One 2012;7:e47100                      | 1                                       | 0                  | 0                                       | 1                        | 1                                                  | 3                  |
| Wang et al. PloS One 2012;7:e38218                     | 1                                       | 0                  | 0                                       | 0                        | 1                                                  | 2                  |
| Miao et al. Cath Cardiovasc Interv 2012;80:361-67      | 0                                       | 0                  | 1                                       | 1                        | 1                                                  | 3                  |
| Zheng et al. J Hypertens 2012;30:901-7                 | 1                                       | 1                  | 1                                       | 1                        | 1                                                  | 5                  |
| Li et al. Kidney and Blood Press Res 2012;36:98-106    | 1                                       | 1                  | 1                                       | 1                        | 1                                                  | 5                  |
| Zhang et al. Lancet 2012;379:815-22                    | 1                                       | 1                  | 1                                       | 1                        | 1                                                  | 5                  |
| Chen et al. Hong Ling Med J 2013;19:214-21             | 0                                       | 1                  | 0                                       | 1                        | 1                                                  | 3                  |
| Xiong et al. J Formos Med Assoc 2014;113:521-6         | 0                                       | 0                  | 1                                       | 1                        | 1                                                  | 3                  |
| Bao et al. QJM 2014;107:443-9                          | 0                                       | 0                  | 1                                       | 1                        | 1                                                  | 3                  |

|                                                    |   |   |   |   |   |   |
|----------------------------------------------------|---|---|---|---|---|---|
| Fu et al. Clin Interv Aging 2014;9:301-8           | 0 | 0 | 0 | 1 | 1 | 2 |
| Fu et al. PLoS One 2014;9:e101013                  | 1 | 0 | 1 | 1 | 1 | 4 |
| Lin et al. BMC Nephrol 2014;15:36                  | 1 | 1 | 1 | 1 | 1 | 5 |
| Luo et al. Stroke 2014;45:2887-93                  | 0 | 1 | 1 | 0 | 1 | 3 |
| Liu et al. Renal Failure 2015;37:1323-8            | 0 | 0 | 1 | 1 | 1 | 3 |
| Yang et al. BMC Nephrology 2015;16:16              | 0 | 0 | 1 | 1 | 1 | 3 |
| Luk et al. PLoS One 2015;10:e0134981               | 0 | 0 | 1 | 1 | 1 | 3 |
| Wang et al. Nephrology 2015;20:474-84              | 1 | 1 | 1 | 1 | 1 | 5 |
| Kong et al. Int Urol Nephrol 2015;47:1547-53       | 1 | 1 | 1 | 1 | 1 | 5 |
| Zhao et al. PLoS One 2015;10:e0135462              | 0 | 1 | 0 | 1 | 1 | 3 |
| Peng et al. Eur J Intern Med 2016;29:78-87         | 0 | 0 | 1 | 1 | 1 | 3 |
| Peng et al. Medicine 2016;95:e2740                 | 0 | 1 | 0 | 1 | 1 | 3 |
| Guo et al. J Diabetes Complications 2016;30:803-10 | 0 | 1 | 1 | 1 | 1 | 4 |
| He et al. Medicine 2016;95:e3769                   | 1 | 1 | 0 | 1 | 1 | 4 |
| Dong et al. Medicine 2017:e5868                    | 0 | 0 | 1 | 1 | 1 | 3 |
| Sun et al. Chin Med J 2017;130:57-63               | 0 | 0 | 1 | 1 | 1 | 3 |
| Yeung et al. J Hepatol 2017;S0168-8278             | 0 | 0 | 0 | 1 | 1 | 2 |
| Inoue et al. BMC Nephrol 2017;18:160               | 1 | 1 | 0 | 1 | 1 | 4 |
| Wang et al. BMC Nephrol 2017;18:188                | 1 | 1 | 0 | 1 | 1 | 4 |
| Wang et al. Biomedical Research 2018;29:3062-8     | 0 | 0 | 1 | 0 | 1 | 2 |
| Ma et al. Int Urol Nephrol 2018;50:2239-44         | 1 | 1 | 1 | 1 | 1 | 5 |
| Lin et al. BMJ Open 2018;8:e019097                 | 0 | 1 | 1 | 1 | 1 | 4 |
| Wang et al. BMC Nephrology 2018;19:294             | 1 | 1 | 0 | 1 | 1 | 4 |
| Wang et al. PLoS ONE 2018;13:e0193734              | 1 | 1 | 0 | 1 | 1 | 4 |
| Su et al. Eur J Intern Med 2018;57:32-8            | 1 | 1 | 0 | 1 | 1 | 4 |
| Wu et al. Scientific Reports 2018;8:2157           | 0 | 1 | 1 | 1 | 1 | 4 |
| Ye et al. BMC Nephrology 2019;20:457               | 1 | 1 | 1 | 1 | 1 | 5 |
| Ye et al. Medicine 2019;98:e14262                  | 0 | 0 | 1 | 1 | 1 | 3 |
| Liu et al. Ann Transl Med 2020;8:2                 | 1 | 1 | 0 | 1 | 1 | 4 |
| Agarwal et al. NDT 2005;20:1638-42                 | 1 | 1 | 0 | 0 | 0 | 2 |

|                                                            |   |   |   |   |   |   |
|------------------------------------------------------------|---|---|---|---|---|---|
| Unnikrishann et al. Diabetes Care 2007;30:2019-24          | 0 | 0 | 1 | 0 | 1 | 2 |
| Singh et al. BMC Nephrol 2009;10:4                         | 1 | 1 | 1 | 1 | 1 | 5 |
| Varma et al. Nephrol Dial Transpl 2010;25:3011-7           | 0 | 1 | 1 | 1 | 1 | 4 |
| Varma et al. MJAFI 2011;67:9-14                            | 0 | 0 | 1 | 1 | 1 | 3 |
| Gallieni et al. Nephrol 2013;18:798-07                     | 1 | 0 | 1 | 1 | 1 | 4 |
| Singh et al. BMC Nephrol 2013;14:114                       | 0 | 1 | 1 | 1 | 1 | 4 |
| Anupama and Uma. Indian J Nephrol 2014;24:214-21           | 1 | 0 | 1 | 1 | 1 | 4 |
| Anand et al. Kidney Int 2015;88:178-85                     | 1 | 1 | 0 | 1 | 1 | 4 |
| Mahapatra et al. Saudi J Kidney Dis Transpl 2016;27:362-70 | 0 | 0 | 0 | 1 | 1 | 2 |
| Trivedi et al. Clin Kidney J 2016;9:438-43                 | 1 | 0 | 1 | 1 | 1 | 4 |
| Anupama et al. J Hum Hypertens 2017;31:327-32              | 1 | 0 | 0 | 1 | 0 | 2 |
| Rajput et al. J Diab Metabol                               | 1 | 1 | 0 | 1 | 1 | 4 |
| Pradeep et al. Urol Nephrol Open Access J 2018;6:167-71    | 1 | 0 | 0 | 1 | 0 | 2 |
| Tatapudi et al. KI Reports 2019;4:380-9                    | 1 | 0 | 1 | 1 | 0 | 3 |
| O'Callaghan-Gordo et al. BMJ Open 2019;9:e023353           | 1 | 1 | 1 | 1 | 1 | 5 |
| Mohanty et al. Int J Environ Res and Public Health         | 1 | 0 | 0 | 1 | 1 | 3 |
| Prodjosudjadi et al. Nephrol 2009;14:669-74                | 1 | 1 | 0 | 1 | 0 | 3 |
| Hosseinpanah et al. BMC Public Health 2009;9:44            | 1 | 1 | 1 | 1 | 1 | 5 |
| Najafi et al. PLoS One 2010;5:e14216                       | 1 | 1 | 1 | 1 | 1 | 5 |
| Mahdavi-Mazdeh et al. Renal Failure 2010;32:62-8           | 1 | 1 | 1 | 1 | 1 | 5 |
| Barahimi et al. Iran J Kidney Dis 2011;5:374-9             | 1 | 0 | 0 | 1 | 0 | 2 |
| Najafi et al. Arch Iranian Med 2012;15:70-5                | 1 | 0 | 1 | 1 | 1 | 4 |
| Malekmakan et al. ISRN Nephrol 2013;2013:427230            | 0 | 0 | 1 | 1 | 1 | 3 |
| Khajehdehi et al. Iranian J Kidney Dis 2014;8:109-15       | 1 | 1 | 1 | 1 | 1 | 5 |
| Naghbi et al. Iranian J Kidney Dis 2015;9:449-53           | 1 | 0 | 1 | 1 | 1 | 4 |
| Panahi et al. Iranian J Kidney Dis 2016;10:274-81          | 1 | 1 | 1 | 1 | 1 | 5 |
| Sepanlou et al. PLoS One 2017;12:e0176540                  | 1 | 1 | 0 | 1 | 0 | 3 |
| Bakhshayeshkaram et al. Galen Med J 2018;7:e935            | 1 | 0 | 0 | 1 | 0 | 2 |
| Mahmoodpoor et al. J Renal Inj Prev 2018;7:124-8           | 1 | 0 | 0 | 1 | 0 | 2 |

|                                                          |   |   |   |   |   |   |
|----------------------------------------------------------|---|---|---|---|---|---|
| Piri-Ardakani et al. Ann Med Health Sci Res 2018;8:26670 | 1 | 0 | 1 | 1 | 1 | 4 |
| Nakamura et al. Circ J 2006;70:954-9                     | 1 | 1 | 1 | 1 | 1 | 5 |
| Iseki et al. Hypertens Res 2007;30:55-62                 | 1 | 1 | 0 | 1 | 0 | 3 |
| Koganei et al. Circ J 2008;72:179-85                     | 0 | 0 | 1 | 1 | 1 | 3 |
| Iguchi et al. Am J Cardiol 2008;102:1056-9               | 1 | 1 | 0 | 0 | 0 | 2 |
| Nakamura et al. Hypertens Res 2009;32:920-6              | 0 | 0 | 1 | 1 | 1 | 3 |
| Takamatsu et al. BMC Nephrol 2009;10:34                  | 0 | 0 | 1 | 1 | 1 | 3 |
| Hamaguchi et al. Circ J 2009;73:1442-7                   | 0 | 0 | 1 | 1 | 1 | 3 |
| Higashiyama et al. Hypertens Res 2009;32:450-4           | 1 | 0 | 1 | 1 | 1 | 4 |
| Kohagura et al. Clin Exp Nephrol 2009;13:614-20          | 1 | 1 | 0 | 1 | 0 | 3 |
| Imai et al. Clin Exp Nephrol 2009;13:621-30              | 1 | 1 | 1 | 1 | 1 | 5 |
| Kiyosue et al. Circ J 2010;74:786-91                     | 0 | 0 | 1 | 1 | 1 | 3 |
| Bouchi et al. Hypertens Res 2010;33:1298-304             | 0 | 0 | 1 | 1 | 1 | 3 |
| Nagata et al. Nephrol Dial Transpl 2010;25:2557-64       | 1 | 0 | 0 | 1 | 0 | 2 |
| Yano et al. Atherosclerosis 2011;219:273-9               | 0 | 0 | 1 | 1 | 1 | 3 |
| Takata et al. Aging Clin Exp Res 2011;23:223-30          | 0 | 1 | 1 | 1 | 1 | 4 |
| Konishi et al. Circ J 2011;75:2372-8                     | 0 | 0 | 1 | 1 | 1 | 3 |
| Kudo et al. Clin Exp Nephrol 2011;15:235-41              | 1 | 1 | 0 | 0 | 0 | 2 |
| Miyatake et al. Environ Health Prev Med 2011;3:191-5     | 1 | 1 | 1 | 1 | 0 | 4 |
| Shimizu et al. Stroke 2011;42:2531-7                     | 1 | 1 | 1 | 1 | 1 | 5 |
| Kudo et al. Clin Exp Nephrol 2012;16:564-9               | 0 | 0 | 1 | 1 | 1 | 3 |
| Hanai et al. Nephrol Dial Transpl 2012;27:1070-5         | 0 | 0 | 0 | 0 | 0 | 0 |
| Kuwashiro et al. Cerebrovasc Dis 2012;33:141-9           | 0 | 0 | 0 | 1 | 0 | 1 |
| Dan et al. Circ J 2012;76:2266-72                        | 0 | 0 | 0 | 1 | 0 | 1 |
| Ohno et al. Kidney Blood Press Res 2012;36:139-48        | 1 | 1 | 0 | 1 | 0 | 3 |
| Wakasugi et al. Clin Exp Nephrol 2012;16:259-68          | 1 | 1 | 0 | 1 | 0 | 3 |
| Furukawa et al. Eur J Endocrinol 2013;169:239-46         | 0 | 0 | 0 | 1 | 0 | 1 |
| Yano et al. Am J Nephrol 2013;38:195-203                 | 0 | 0 | 1 | 1 | 1 | 3 |
| Konta et al. Clin Exp Nephrol 2013;17:805-10             | 1 | 1 | 1 | 1 | 1 | 5 |

|                                                             |   |   |   |   |   |   |
|-------------------------------------------------------------|---|---|---|---|---|---|
| Noborisaka et al. Environ Health Prev Med 2013;18:466-76    | 1 | 1 | 0 | 1 | 0 | 3 |
| Yamada et al. Arch Gerontol Geriatr 2013;57:328-32          | 0 | 1 | 0 | 1 | 0 | 2 |
| Shimizu et al. Atherosclerosis 2014;2014:233:525-9          | 0 | 1 | 1 | 1 | 1 | 4 |
| Ishida et al. J Hypertension 2014;32:1435-43                | 1 | 1 | 1 | 1 | 1 | 5 |
| Tsuruya et al. Atherosclerosis 2014;233:260-7               | 1 | 1 | 1 | 1 | 1 | 5 |
| Tanaka et al. Nephrology 2015;20:531-8                      | 1 | 1 | 0 | 0 | 0 | 2 |
| Nagai et al. PloS One 2019;11:e0156792                      | 1 | 1 | 1 | 1 | 1 | 5 |
| Nakahashi et al. Heart Vessels 2017;32:22-9                 | 0 | 0 | 1 | 1 | 1 | 3 |
| Hara et al. Clin Exp Nephrol 2017;21:275-82                 | 0 | 0 | 0 | 1 | 0 | 1 |
| Tokoroyama et al. Nephrol Dial Transpl 2017;32:2035-42      | 0 | 0 | 1 | 1 | 1 | 3 |
| Esato et al. Chest 2017;152:1266-75                         | 0 | 0 | 0 | 1 | 0 | 1 |
| Hirata et al. Eur J Prev Cardiol 2017;24:505-23             | 0 | 1 | 1 | 1 | 1 | 4 |
| Nishikawa et al. Clin Exp Nephrol 2017;21:316-23            | 1 | 1 | 1 | 1 | 1 | 5 |
| Yokomichi et al. J Epidemiol 2017;27:S98-106                | 0 | 1 | 0 | 1 | 0 | 2 |
| Dan et al. Cardiorenal Med 2018;8:151-9                     | 0 | 0 | 0 | 1 | 0 | 1 |
| Matsumoto et al. World J Urol 2018;36:                      | 0 | 0 | 1 | 1 | 1 | 3 |
| Yanagisawa et al. Heart Rhythm 2018;15:348-54               | 0 | 0 | 1 | 1 | 1 | 3 |
| Kuwabara et al. Nutrients 2018;10:1011                      | 1 | 1 | 0 | 1 | 0 | 3 |
| Kichikawa et al. Cardiovasc Intervent Radiol 2019;42:358-64 | 0 | 0 | 0 | 1 | 0 | 1 |
| Fujii et al. Nephrol 2019;24:670-73                         | 1 | 1 | 0 | 1 | 0 | 3 |
| Toda et al. Nephron 2019;142:91-7                           | 1 | 1 | 0 | 1 | 0 | 3 |
| Kashihara et al. Kidney Int Rep 2019;4:1248-60              | 0 | 1 | 0 | 1 | 0 | 2 |
| Nagai et al. PloS One 2019;14:e0216432                      | 0 | 1 | 0 | 1 | 0 | 2 |
| Tsuyuki et al. Thromb Res 2020;187:39-47                    | 0 | 0 | 1 | 1 | 1 | 3 |
| Hooi et al. Kidney Int 2013;84:1034-40                      | 1 | 0 | 0 | 1 | 0 | 2 |
| Abougambou et al. Diabetes Metab Syndr 2013;7:64-7          | 0 | 0 | 1 | 1 | 1 | 3 |
| Ismail et al. BMC Cardiovasc Discord 2018;18:184            | 0 | 1 | 1 | 1 | 1 | 4 |
| Saminathan et al. BMC Nephrol 2020;21:344                   | 1 | 0 | 0 | 1 | 0 | 2 |
| Sharma et al. Am J Kidney Dis 2010;56:915-27                | 0 | 0 | 0 | 1 | 1 | 2 |



|                                                                            |   |   |   |   |   |   |
|----------------------------------------------------------------------------|---|---|---|---|---|---|
| Sharma et al. Am J Kidney Dis 2010;56:915-27                               | 1 | 1 | 0 | 1 | 1 | 4 |
| Cravedi et al. BMJ Open 2012;2:e001357                                     | 1 | 1 | 0 | 1 | 1 | 4 |
| Sharma et al. J Nepal Med Assoc 2013;52:205-12                             | 1 | 1 | 0 | 1 | 0 | 3 |
| Jafar et al. Nephrol Dial Transpl 2009;24:2111-6                           | 1 | 1 | 0 | 1 | 1 | 4 |
| Ishtiaque et al. PLoS One 2014;9:e85652                                    | 1 | 0 | 1 | 1 | 1 | 4 |
| Jessani et al. BMC Nephrol 2014;15:90                                      | 1 | 0 | 1 | 1 | 1 | 4 |
| Feng et al. Nephrol Dial Transplant 2019;34:1723-30                        | 0 | 0 | 0 | 1 | 1 | 2 |
| NNHeS renal report <a href="http://goo.gl/XKADci">http://goo.gl/XKADci</a> | * | * | * | * | * | * |
| Nang et al. Am J Epidemiol 2009;169:1456-62                                | 1 | 1 | 0 | 1 | 1 | 4 |
| Sabanayagam et al. Nephrol Dial Transpl 2010;25:2564-70                    | 1 | 1 | 0 | 1 | 1 | 4 |
| Tay et al. Acta Cardiol 2010;65:211-6                                      | 0 | 1 | 1 | 1 | 1 | 4 |
| Feng et al. J Am Geriatr Soc 2012;60:1208-14                               | 1 | 0 | 1 | 1 | 1 | 4 |
| Low et al. Ann Acad Med Singapore 2015;44:164-71                           | 0 | 0 | 0 | 1 | 1 | 2 |
| Lew et al. Nephron 2018;138:202-13                                         | 1 | 1 | 1 | 1 | 1 | 5 |
| Han et al. BMC Nephrol 2009;10:39                                          | 0 | 0 | 1 | 1 | 1 | 3 |
| Shin et al. BMC Nephrol 2011;12:29                                         | 1 | 0 | 1 | 1 | 1 | 4 |
| Yang et al. Nephrol Dial Transplant 2011;26:3249-255                       | 0 | 1 | 1 | 1 | 1 | 4 |
| KNHANES 2011 $\alpha$                                                      | 1 | 1 | 1 | 1 | 1 | 5 |
| Park et al. Cardiovasc Therapeutics 2012;30:5-11                           | 0 | 0 | 0 | 1 | 1 | 2 |
| Kim et al. BMC Public Health 2012;12:960                                   | 1 | 1 | 0 | 1 | 1 | 4 |
| Kweon et al. Diabetes Res Clin Pract 2012;3:492-8                          | 1 | 1 | 1 | 1 | 1 | 5 |
| Choi et al. Nephrol Dial Transplant 2012;27:3868-74                        | 0 | 1 | 1 | 1 | 1 | 4 |
| Oh et al. Nephrol Dial Transpl 2012;27:2284-90                             | 1 | 1 | 1 | 1 | 1 | 5 |
| Kim et al. Jap J Clin Oncol 2013;43:1243-48                                | 0 | 0 | 1 | 1 | 1 | 3 |
| Hwang et al. Am J Nephrol 2014;40:345-52                                   | 0 | 1 | 1 | 1 | 1 | 4 |
| Mok et al. PLoS One 2016;11:e0153429                                       | 1 | 1 | 1 | 1 | 1 | 5 |
| Lee et al. J Clin Sleep Med 2017;13:1145-52                                | 1 | 0 | 0 | 1 | 1 | 3 |
| Kim et al. Medicine 2018;97:e13099                                         | 1 | 1 | 1 | 1 | 1 | 5 |
| Kim et al. Int J Cardiol 2018;262:32-7                                     | 0 | 0 | 1 | 1 | 1 | 3 |
| Cha et al. Circ J 2018;82:2970-5                                           | 0 | 1 | 0 | 1 | 1 | 3 |

|                                                     |   |   |   |   |   |   |
|-----------------------------------------------------|---|---|---|---|---|---|
| Lim et al. J Viral Hepa 2019;27:316-22              | 1 | 0 | 0 | 1 | 1 | 3 |
| Athuraliya et al. Kidney Int 2011;80:1212-21        | 1 | 1 | 0 | 1 | 1 | 4 |
| Jayasekara et al. J Epidemiol 2015;25:275-80        | 1 | 1 | 0 | 0 | 0 | 2 |
| Weerathna et al. BioMed Res Int 2018;8178043        | 0 | 0 | 1 | 1 | 1 | 3 |
| Feng et al. Nephrol Dial Transplant 2019;34:1723-30 | 0 | 0 | 0 | 1 | 1 | 2 |
| Ranasinghe et al. BMC Nephrol 2019;20:338           | 1 | 1 | 0 | 1 | 1 | 4 |
| Hsu et al. Am J Kidney Dis 2006;48:727-38           | 1 | 1 | 0 | 1 | 1 | 4 |
| Chou et al. Int Med J 2008;38:402-6                 | 1 | 0 | 1 | 1 | 1 | 4 |
| Kang et al. J Occup Environ Med 2007;49:776-9       | 1 | 1 | 1 | 1 | 1 | 5 |
| Chen et al. Maturitas 2008;59:55-61                 | 1 | 0 | 0 | 1 | 1 | 3 |
| Wu et al. Am J Med Sci 2008;336:303-8               | 0 | 0 | 1 | 1 | 1 | 3 |
| Cheng et al. Am J Kidney Dis 2008;52:1051-60        | 1 | 1 | 1 | 1 | 1 | 5 |
| Wen et al. Lancet 2008;371:2173-82                  | 1 | 1 | 1 | 1 | 1 | 5 |
| Tseng. Clin Biochem 2009;42:1019-24                 | 0 | 0 | 1 | 1 | 1 | 3 |
| Lin et al. Nephrol Dial Transplant 2010;25:3230-235 | 0 | 1 | 1 | 1 | 1 | 4 |
| Hsu et al. Nephrology 2011;16:751-7                 | 1 | 1 | 1 | 1 | 1 | 5 |
| Lin et al. PLoS One 2012;7:e47960                   | 1 | 0 | 1 | 1 | 1 | 4 |
| Lin et al. Cardiovasc Diabetol 2012;11:131          | 0 | 1 | 1 | 1 | 1 | 4 |
| Hsieh et al. Cerebrovascular Disease 2014;37:51-6   | 0 | 0 | 1 | 1 | 1 | 3 |
| Lin et al. Biomed Res Int 2014;24:841497            | 1 | 0 | 1 | 0 | 1 | 3 |
| Lin et al. BMC Nephrol 2014;15:66                   | 0 | 0 | 1 | 1 | 1 | 3 |
| Li et al. Intern Med J 2014;44:645-52               | 1 | 1 | 0 | 1 | 1 | 4 |
| Hsieh et al. J stroke Cerebrovasc Dis 2015;24:673-9 | 0 | 1 | 1 | 1 | 1 | 4 |
| Lin et al. Heart Vess 2015;30:441-50                | 1 | 1 | 0 | 1 | 1 | 4 |
| Tsai et al. Eur J Clin Nutr 2015;69:34-9            | 1 | 0 | 1 | 0 | 1 | 3 |
| Yeh et al. Atherosclerosis 2015;239:328-34          | 0 | 0 | 1 | 1 | 1 | 3 |
| Chang et al. Acta Cardiol Sin 2015;31:106-12        | 1 | 1 | 0 | 1 | 1 | 4 |
| Chua et al. Nephrol 2016;21:583-91                  | * | * | * | * | * | * |
| Chu et al. J Am Coll Cardiol 2016;67:S58            | 0 | 1 | 0 | 0 | 1 | 2 |
| Lin et al. BMC Cardiovasc Dis 2017;17:242           | 0 | 0 | 1 | 1 | 1 | 3 |

|                                                                 |   |   |   |   |   |   |
|-----------------------------------------------------------------|---|---|---|---|---|---|
| Lai et al. <i>Kidney Int</i> 2017;92:703-9                      | 1 | 1 | 0 | 1 | 1 | 4 |
| Li et al. <i>BMJ Open</i> 2018;8:e021655                        | 0 | 0 | 1 | 1 | 1 | 3 |
| Chen et al. <i>Environ Pollut</i> 2018;234:838-45               | 0 | 1 | 0 | 1 | 1 | 3 |
| Lai et al. <i>Family Pract</i> 2018;35:259-65                   | 1 | 1 | 0 | 1 | 1 | 4 |
| Wang et al. <i>Atherosclerosis</i> 2018;269:288-93              | 0 | 1 | 1 | 1 | 1 | 4 |
| Tsai et al. <i>Nephron</i> 2018;140:175-84                      | 1 | 1 | 1 | 1 | 1 | 5 |
| Chang et al. <i>BMC Neurol</i> 2019;19:180                      | 0 | 0 | 0 | 1 | 1 | 2 |
| Taiwan individual participant data                              | * | * | * | * | * | * |
| Domrongkitchaiporn et al. <i>J Am Soc Nephrol</i> 2005;16:791-9 | 1 | 1 | 0 | 1 | 1 | 4 |
| Chittinandana et al <i>J Med Assoc Thai</i> 2006;89:S112-20     | 1 | 1 | 1 | 1 | 1 | 5 |
| Perkovic et al. <i>Kidney Int</i> 2008;73:473-9                 | 1 | 1 | 1 | 1 | 1 | 5 |
| Ingsathit et al. <i>Nephrol Dial Transplant</i> 2010;25:1567-75 | 1 | 1 | 1 | 1 | 1 | 5 |
| Zaman et al. <i>Diabetes Res Clin Pract</i> 2018;138:238-45     | 0 | 1 | 0 | 1 | 1 | 3 |
| Jitraknatee et al. <i>Sci Rep</i> 2020;10:6205                  | 0 | 0 | 1 | 1 | 1 | 3 |
| Ito et al. <i>Nephron Clin Pract</i> 2008;109:c25-32            | * | * | * | * | * | * |
| Tran et al. <i>BMC Res Notes</i> 2017;10:523                    | 1 | 0 | 0 | 1 | 1 | 3 |

^Low risk was defined as 4-5 points; moderate risk as 3 points and high risk of bias was defined as 0-2 points.; \*insufficient information provided  
CKD=chronic kidney disease

**Supplementary appendix 5: Estimated prevalence and number of people with CKD (overall and stage 4-5) in countries of Asia, by cluster, based on studies published between 2010 and 2020**

| Cluster | Countries               | Number of people aged ≥20 years in 2020 (x million) | Overall CKD <sup>#</sup>               |                                    |                                        |                                    | Advanced CKD <sup>*</sup>              |                                    |                                        |                                 |
|---------|-------------------------|-----------------------------------------------------|----------------------------------------|------------------------------------|----------------------------------------|------------------------------------|----------------------------------------|------------------------------------|----------------------------------------|---------------------------------|
|         |                         |                                                     | Population-based studies               |                                    | All studies                            |                                    | Population-based studies               |                                    | All studies                            |                                 |
|         |                         |                                                     | Number of patients (x million; 95% CI) | Prevalence (%; 95% CI)             | Number of patients (x million; 95% CI) | Prevalence (%; 95% CI)             | Number of patients (x million; 95% CI) | Prevalence (%; 95% CI)             | Number of patients (x million; 95% CI) | Prevalence (%; 95% CI)          |
| 1       | Afghanistan             | 18.02                                               | 3.06 (2.74 to 3.39)                    | 17.0 (15.2 to 18.8) <sup>(b)</sup> | 2.77 (2.16 to 3.39)                    | 15.4 (12.0 to 18.8) <sup>(b)</sup> | 3.06 (2.74 to 3.39)                    | 17.0 (15.2 to 18.8) <sup>(b)</sup> | 0.16 (0.04 to 0.29)                    | 0.9 (0.2 to 1.6) <sup>(b)</sup> |
|         | Pakistan <sup>(a)</sup> | 122.00                                              | 8.71 (7.79 to 9.64)                    | 17.0 (15.2 to 18.8)                | 7.89 (6.15 to 9.64)                    | 15.4 (12.0 to 18.8)                | 8.71 (7.79 to 9.64)                    | 17.0 (15.2 to 18.8) <sup>(c)</sup> | 0.46 (0.1 to 0.82)                     | 0.9 (0.2 to 1.6)                |
| 2       | Bangladesh              | 105.04                                              | 17.23 (2.1 to 32.35)                   | 16.4 (2.0 to 30.8)                 | 20.8 (10.29 to 31.41)                  | 19.8 (9.8 to 29.9)                 | 6.51 (0 to 16.07)                      | 6.2 (0.0 to 15.3)                  | 4.73 (0 to 12.39)                      | 4.5 (0.0 to 11.8)               |
|         | Bhutan                  | 0.51                                                | 0.07 (0.05 to 0.1)                     | 14.7 (10.6 to 18.9) <sup>(b)</sup> | 0.08 (0.06 to 0.1)                     | 15.4 (11.5 to 19.4) <sup>(b)</sup> | 0.01 (0 to 0.04)                       | 2.0 (0.0 to 7.2) <sup>(b)</sup>    | 0.01 (0 to 0.02)                       | 1.3 (0.0 to 4.9) <sup>(b)</sup> |
|         | Nepal                   | 17.55                                               | 2.56 (1.81 to 3.32)                    | 14.6 (10.3 to 18.9)                | 2.56 (1.81 to 3.32)                    | 14.6 (10.3 to 18.9)                | 0.05 (0.05 to 0.07)                    | 0.3 (0.3 to 0.4)                   | 0.05 (0.05 to 0.07)                    | 0.3 (0.3 to 0.4)                |
| 3       | Cambodia                | 10.09                                               | 1.31 (1.17 to 1.44)                    | 13.0 (11.6 to 14.3) <sup>(b)</sup> | 1.42 (1.05 to 1.8)                     | 14.1 (10.4 to 17.8) <sup>(b)</sup> | 0.11 (0 to 0.34)                       | 1.1 (0.0 to 3.4) <sup>(b)</sup>    | 0.11 (0 to 0.33)                       | 1.1 (0.0 to 3.3) <sup>(b)</sup> |
|         | Laos                    | 4.24                                                | 0.55 (0.49 to 0.61)                    | 13.0 (11.6 to 14.3) <sup>(b)</sup> | 0.6 (0.44 to 0.76)                     | 14.1 (10.4 to 17.8) <sup>(b)</sup> | 0.05 (0 to 0.14)                       | 1.1 (0.0 to 3.4) <sup>(b)</sup>    | 0.05 (0 to 0.14)                       | 1.1 (0.0 to 3.3) <sup>(b)</sup> |
|         | Myanmar                 | 35.47                                               | 4.61 (4.11 to 5.07)                    | 13.0 (11.6 to 14.3) <sup>(b)</sup> | 5 (3.69 to 6.31)                       | 14.1 (10.4 to 17.8) <sup>(b)</sup> | 0.39 (0 to 1.21)                       | 1.1 (0.0 to 3.4) <sup>(b)</sup>    | 0.39 (0 to 1.17)                       | 1.1 (0.0 to 3.3) <sup>(b)</sup> |
|         | India                   | 892.94                                              | 125.01 (91.08 to 158.94)               | 14.0 (10.2 to 17.8)                | 150.01 (107.15 to 192.88)              | 16.8 (12.0 to 21.6)                | 21.43 (8.93 to 33.93)                  | 2.4 (1.0 to 3.8)                   | 20.54 (10.72 to 29.47)                 | 2.3 (1.2 to 3.3)                |
|         | Indonesia               | 179.26                                              | 23.3 (20.79 to 25.63)                  | 13.0 (11.6 to 14.3) <sup>(b)</sup> | 25.28 (18.64 to 31.91)                 | 14.1 (10.4 to 17.8) <sup>(b)</sup> | 1.97 (0 to 6.09)                       | 1.1 (0.0 to 3.4) <sup>(b)</sup>    | 1.97 (0 to 5.92)                       | 1.1 (0.0 to 3.3) <sup>(b)</sup> |
|         | Philippines             | 66.20                                               | 8.61 (7.68 to 9.47)                    | 13.0 (11.6 to 14.3) <sup>(b)</sup> | 9.33 (6.88 to 11.78)                   | 14.1 (10.4 to 17.8) <sup>(b)</sup> | 0.73 (0 to 2.25)                       | 1.1 (0.0 to 3.4) <sup>(b)</sup>    | 0.73 (0 to 2.18)                       | 1.1 (0.0 to 3.3) <sup>(b)</sup> |
|         | Timor-Leste             | 0.68                                                | 0.09 (0.08 to 0.1)                     | 13.0 (11.6 to 14.3) <sup>(b)</sup> | 0.1 (0.07 to 0.12)                     | 14.1 (10.4 to 17.8) <sup>(b)</sup> | 0.007 (0 to 0.023)                     | 1.1 (0.0 to 3.4) <sup>(b)</sup>    | 0.007 (0 to 0.022)                     | 1.1 (0.0 to 3.3) <sup>(b)</sup> |
|         | Viet Nam                | 68.26                                               | 8.74 (7.71 to 9.69)                    | 12.8 (11.3 to 14.2)                | 8.74 (7.71 to 9.69)                    | 12.8 (11.3 to 14.2)                | 0.07 (0 to 0.14)                       | 0.1 (0.0 to 0.2)                   | 0.07 (0 to 0.14)                       | 0.1 (0.0 to 0.2)                |
|         | North Korea             | 17.88                                               | 2.32 (2.07 to 2.56)                    | 13.0 (11.6 to 14.3) <sup>(b)</sup> | 2.52 (1.86 to 3.18)                    | 14.1 (10.4 to 17.8) <sup>(b)</sup> | 0.2 (0 to 0.61)                        | 1.1 (0.0 to 3.4) <sup>(b)</sup>    | 0.2 (0 to 0.59)                        | 1.1 (0.0 to 3.3) <sup>(b)</sup> |
| 4       | Brunei                  | 0.31                                                | 0.04 (0.02 to 0.06)                    | 12.2 (5.8 to 18.6) <sup>(b)</sup>  | 0.06 (0.03 to 0.08)                    | 18.2 (10.8 to 25.7) <sup>(b)</sup> | 0.001 (0 to 0.002)                     | 0.4 (0.1 to 0.7) <sup>(b)</sup>    | 0.001 (0 to 0.002)                     | 0.4 (0.1 to 0.7) <sup>(b)</sup> |
|         | Malaysia                | 22.11                                               | 2.7 (1.28 to 4.11)                     | 12.2 (5.8 to 18.6)                 | 4.02 (2.39 to 5.68)                    | 18.2 (10.8 to 25.7)                | 0.09 (0.02 to 0.15)                    | 0.4 (0.1 to 0.7)                   | 0.09 (0.02 to 0.15)                    | 0.4 (0.1 to 0.7)                |
| 5       | China                   | 1102.05                                             | 105.8 (83.76 to 126.74)                | 9.6 (7.6 to 11.5)                  | 165.31 (150.98 to 179.63)              | 15.0 (13.7 to 16.3)                | 2.2 (1.1 to 3.31)                      | 0.2 (0.1 to 0.3)                   | 28.65 (22.04 to 35.27)                 | 2.6 (2.0 to 3.2)                |
|         | Thailand                | 53.87                                               | 7.76 (7.11 to 8.4)                     | 14.4 (13.2 to 15.6)                | 11.42 (7.27 to 15.62)                  | 21.2 (13.5 to 29.0)                | 0.59 (0.38 to 0.75)                    | 1.1 (0.7 to 1.4)                   | 1.89 (0 to 4.58)                       | 3.5 (0.0 to 8.5)                |
|         | Sri Lanka               | 14.68                                               | 1.16 (0 to 2.83)                       | 7.9 (0.0 to 19.3)                  | 2.85 (1.51 to 4.2)                     | 19.4 (10.3 to 28.6)                | 0 (0 to 0)                             | 0.0 (0.0 to 0.0)                   | 0.35 (0.19 to 0.5)                     | 2.4 (1.3 to 3.4)                |
|         | Maldives                | 0.41                                                | 0.04 (0.02 to 0.06)                    | 9.9 (5.7 to 14.2) <sup>(b)</sup>   | 0.08 (0.06 to 0.1)                     | 19.6 (13.8 to 25.4) <sup>(b)</sup> | 0 (0 to 0)                             | 0.6 (0.2 to 0.9) <sup>(b)</sup>    | 0.01 (0.01 to 0.02)                    | 3.5 (1.9 to 5.1) <sup>(b)</sup> |
|         | Taiwan                  | 19.58                                               | 1.1 (0.25 to 1.92)                     | 5.6 (1.3 to 9.8)                   | 4.62 (3.95 to 5.29)                    | 23.6 (20.2 to 27.0)                | 0.12 (0.11 to 0.13)                    | 0.6 (0.6 to 0.6)                   | 1.15 (0.88 to 1.43)                    | 5.9 (4.5 to 7.3)                |
| 6       | Japan                   | 105.03                                              | 14.39 (10.4 to 18.38)                  | 13.7 (9.9 to 17.5)                 | 27.41 (24.47 to 30.25)                 | 26.1 (23.3 to 28.8)                | 0.21 (0.11 to 0.32)                    | 0.2 (0.1 to 0.3)                   | 5.46 (3.99 to 6.83)                    | 5.2 (3.8 to 6.5)                |
|         | Singapore               | 4.87                                                | 0.76 (0.71 to 0.81)                    | 15.6 (14.5 to 16.7)                | 1.43 (1.03 to 1.82)                    | 29.3 (21.1 to 37.4)                | 0.07 (0.05 to 0.09)                    | 1.5 (1.1 to 1.8)                   | 0.22 (0.11 to 0.32)                    | 4.5 (2.3 to 6.6)                |
|         | South Korea             | 42.36                                               | 2.97 (2.16 to 3.77)                    | 7.0 (5.1 to 8.9)                   | 6.86 (5.8 to 7.88)                     | 16.2 (13.7 to 18.6)                | 1.61 (1.4 to 1.82)                     | 3.8 (3.3 to 4.3)                   | 1.61 (0.42 to 2.8)                     | 3.8 (1.0 to 6.6)                |
| 7       | Iran                    | 57.68                                               | 5.88 (3.98 to 7.79)                    | 10.2 (6.9 to 13.5)                 | 7.9 (5.54 to 10.21)                    | 13.7 (9.6 to 17.7)                 | 0.29 (0 to 0.87)                       | 0.5 (0.0 to 1.5)                   | 0.23 (0.12 to 0.35)                    | 0.4 (0.2 to 0.6)                |
| 8       | Mongolia                | 2.04                                                | 0.16 (0.13 to 0.19)                    | 7.8 (6.2 to 9.5)                   | 0.16 (0.13 to 0.19)                    | 7.8 (6.2 to 9.5)                   | 0.03 (0.02 to 0.05)                    | 1.6 (0.8 to 2.4)                   | 0.03 (0.02 to 0.05)                    | 1.6 (0.8 to 2.4)                |

|  |              |                |                                 |                           |                                  |                            |                              |                         |                                |                         |
|--|--------------|----------------|---------------------------------|---------------------------|----------------------------------|----------------------------|------------------------------|-------------------------|--------------------------------|-------------------------|
|  | <b>Total</b> | <b>2963.12</b> | <b>348.93 (259.5 to 437.36)</b> | <b>11.8 (8.8 to 14.8)</b> | <b>469.22 (371.14 to 567.23)</b> | <b>15.8 (12.5 to 19.1)</b> | <b>48.52 (22.7 to 81.43)</b> | <b>1.6 (0.8 to 2.7)</b> | <b>69.17 (38.71 to 105.85)</b> | <b>2.3 (1.3 to 3.6)</b> |
|--|--------------|----------------|---------------------------------|---------------------------|----------------------------------|----------------------------|------------------------------|-------------------------|--------------------------------|-------------------------|

#defined as eGFR <60 ml/min/1.73m<sup>2</sup> or evidence of proteinuria; \*defined as eGFR <30 ml/min/1.73m<sup>2</sup>

(a) Data on people aged 20-39 years were unavailable; CKD prevalence was therefore estimated in people aged 40 years or older;

(b) Prevalence of CKD (overall and advanced) was estimated based on data from others countries included in the same cluster for which CKD prevalence data were available using a random effects meta-analysis

(c) Prevalence for overall CKD were used in place of those for advanced CKD, because of no available data for advanced CKD.

CKD=chronic kidney disease; CI=confidence interval
